1 The Dynamics of Influenza A H3N2 Defective Viral Genomes from a Human Challenge Study

2

3 Michael A. Martin<sup>a,b,#</sup>, Drishti Kaul<sup>c</sup>, Gene S. Tan<sup>c,d</sup>, Christopher W. Woods<sup>e</sup>, Katia Koelle<sup>a</sup>

4

5 <sup>a</sup>Department of Biology, Emory University, Atlanta, GA, USA

6 <sup>b</sup>Population Biology, Ecology, and Evolution Graduate Program, Laney Graduate School, Emory

7 University, Atlanta, GA, USA

8 <sup>c</sup>Infectious Diseases, The J. Craig Venter Institute, La Jolla, California, USA

9 <sup>d</sup>Division of Infectious Diseases, Department of Medicine, University California San Diego, La

10 Jolla, California, USA

11 <sup>d</sup>Center for Applied Genomics and Precision Medicine, Duke University School of Medicine,

12 Durham, NC, USA

13

14 Running Head: Within-Host Influenza A Defective Viral Genomes

15

16 #Address correspondence to Michael A. Martin, [michael.martin2@emory.edu](mailto:michael.martin2@emory.edu)

17 Abstract: 248 words

18 Importance: 135 words

19 Main text: 4,747 words

20 **Abstract**

21 The rapid evolution of influenza is an important contributing factor to its high worldwide  
22 incidence. The emergence and spread of genetic point mutations has been thoroughly studied  
23 both within populations and within individual hosts. In addition, influenza viruses are also  
24 known to generate genomic variation during their replication in the form of defective viral  
25 genomes (DVGs). These DVGs are formed by internal deletions in at least one gene segment that  
26 render them incapable of replication without the presence of wild-type virus. DVGs have  
27 previously been identified in natural human infections and may be associated with less severe  
28 clinical outcomes. These studies have not been able to address how DVG populations evolve *in*  
29 *vivo* in individual infections due to their cross-sectional design. Here we present an analysis of  
30 DVGs present in samples from two longitudinal influenza A H3N2 human challenge studies. We  
31 observe the generation of DVGs in almost all subjects. Although the genetic composition of  
32 DVG populations was highly variable, identical DVGs were observed both between multiple  
33 samples within single hosts as well as between hosts. Most likely due to stochastic effects, we  
34 did not observe clear instances of selection for specific DVGs or for shorter DVGs over the  
35 course of infection. Furthermore, DVG presence was not found to be associated with peak viral  
36 titer or peak symptom scores. Our analyses highlight the diversity of DVG populations within a  
37 host over the course of infection and the apparent role that genetic drift plays in their population  
38 dynamics.

39 **Importance**

40 The evolution of influenza virus, in terms of single nucleotide variants and the reassortment of  
41 gene segments, has been studied in detail. However, influenza is known to generate defective  
42 viral genomes (DVGs) during replication, and little is known about how these genomes evolve  
43 both within hosts and at the population level. Studies in animal models have indicated that  
44 prophylactically or therapeutically administered DVGs can impact patterns of disease  
45 progression. However, the formation of naturally-occurring DVGs, their evolutionary dynamics,  
46 and their contribution to disease severity in human hosts is not well understood. Here, we  
47 identify the formation of *de novo* DVGs in samples from human challenge studies throughout the  
48 course of infection. We analyze their evolutionary trajectories, revealing the important role of  
49 genetic drift in shaping DVG populations during acute infections with well-adapted viral strains.

## 50 **Introduction**

51 Influenza defective viral genomes (DVGs) were first reported by von Magnus (1) and have since  
52 been characterized *in vivo* during high multiplicity of infection (MOI) passage studies (2–7) as  
53 well as from clinical human samples (8, 9). DVGs are classified as viral genomes harboring  
54 mutations which render them incapable of self-replication. Their propagation depends on  
55 replication by wild-type helper virus (10). Influenza DVGs are formed by large internal deletions  
56 (11), which retain the 3' and 5' untranslated regions that are necessary for replication (12–15)  
57 and virion packaging (16–18). Although DVGs have been observed in all eight influenza gene  
58 segments (8, 19, 20), they have been most commonly found in the three polymerase genes (PB2,  
59 PB1, PA) (19, 21), the longest gene segments of the influenza virus genome.

60 DVGs that interfere with the replication of wild-type virus have been termed defective  
61 interfering particles, or DIPs. It is thought that DIPs are either preferentially replicated (22)  
62 and/or packaged (23, 24) given their shorter length. This is thought to lead to the characteristic  
63 oscillations in the relative populations of DIP and wild-type virus during passage studies (6) as  
64 DIP populations outcompete wild-type virus initially but ultimately crash when the quantity of  
65 wild-type virus drops below that necessary to maintain DIP populations. DIPs may also  
66 contribute to immune system activation (25, 26). The presence of DVGs during the course of an  
67 infection also appears to be associated with less severe clinical outcomes (9). The use of  
68 exogenous DIPs has been proposed as a potential therapeutic for influenza, with recent animal  
69 studies demonstrating that DIPs administered prophylactically and/or therapeutically can reduce  
70 the severity of clinical disease outcomes (27–30).

71 Influenza A virus (IAV) DVGs have been previously detected in natural human  
72 infections from deep sequencing data (8). In this cohort study, DVGs were present in about half

73 of the samples analyzed and were most common in the PB2, PB1, and PA gene segments. A  
74 limitation of this study, however, is that it offered only a cross-sectional view of IAV DVG  
75 populations. While it has been shown that Sendai virus DVG populations expand during the first  
76 12 hours of infection in a mouse model (25), the evolution of IAV DVG populations within a  
77 human host over the course of an infection has not been well characterized.

78 Here, we report an analysis of IAV DVG populations identified from deep sequencing  
79 data taken over the course of infection during two longitudinal human challenge studies with  
80 different treatment cohorts. We observe the generation of *de novo* DVGs in nearly all subjects,  
81 primarily in the polymerase gene segments (PB2, PB1, and PA). DVG populations were highly  
82 variable over time in DVG species composition as well as in DVG species relative abundance.  
83 Over the course of infection, individual DVG species were observed to arise, fluctuate in  
84 abundance, as well as disappear from the DVG population. Overall, we found no trend towards  
85 decreasing diversity of DVG populations or towards shorter DVG species during the five days  
86 post challenge, likely due to the dominance of stochastic effects. Furthermore, we were unable to  
87 detect an association between DVG levels and peak viral titers, potentially due to the negative  
88 feedback between DVG and wild-type virus. Similarly, higher DVG levels were not associated  
89 with more severe symptoms. This study helps to illustrate the stochastic dynamics of DVG  
90 populations within a host during acute infection with a well-adapted viral strain, a scenario under  
91 which fitness variation in the wild-type virus population is expected to be relatively small.

## 92 **Materials and Methods**

93 *Ethics statement.* The procedures followed in the human challenge studies were in accordance  
94 with the Declaration of Helsinki. The studies were approved by the institutional review boards  
95 (IRBs) of Duke University Medical Center (Durham, NC), the Space and Naval Warfare

96 Systems Center San Diego (SSD-SD) of the US Department of Defense (Washington, DC), the  
97 East London and City Research Ethics Committee 1 (London, UK), and the Independent  
98 Western Institutional Review Board (Olympia, WA). All participants provided written consent.  
99 *Subject enrollment and challenge study protocol.* Data analyzed in this study were from two  
100 previously described human challenge studies (“study 1” indicated by three digit sample IDs and  
101 “study 2” indicated by four digit sample IDs beginning with a 5) (31–38). These studies were  
102 originally designed to assess changes in host gene expression during the course of influenza  
103 infection. Subjects were intranasally inoculated with 3.08 – 6.41 log<sub>10</sub>(TCID<sub>50</sub>/mL) of the  
104 challenge virus (“reference strain”). The reference strain was produced by passaging a human  
105 isolate of A/Wisconsin/67/2005 (H3N2) [GenBank accession numbers CY114381 to CY114388]  
106 three times in avian primary chicken kidney cells, 4 times in embryonated chicken eggs, and  
107 twice in GMP Vero cells.

108           A subset of subjects in study 2 were treated with oseltamivir on the evening of the  
109 first day post challenge (“early treatment cohort”). All study one and remaining study two  
110 received oseltamivir on the evening of the fifth day post challenge (“standard treatment cohort”).  
111 Nasal wash samples were taken at various time-points post-challenge (study 1: 0, 24, 48, 72, 96,  
112 120, 144, 168 hours; study 2: 23, 29, 42, 53, 70, 76.5, 95, 100.5, 118, 124.5, 141.5, 148.5, 165  
113 hours).

114           Time of peak viral titer was defined as the time from challenge to the earliest time point  
115 at which the maximum viral titer was reached. Duration of infection was defined as the time  
116 from challenge to the latest positive viral titer.

117           Modified Jackson symptom scores (41) were also collected throughout the seven days  
118 post challenge (study 1: 0, 12, 21, 36, 45, 60, 69, 84, 93, 108, 117, 132, 141, 156, and 164 hours;

119 study 2: 0, 8, 16, 24, 32, 40, 48, 56, 64, 72, 80, 88, 96, 104, 112, 120, 132, 144, 156, 168  
120 hours). Time to peak symptom score was defined as the time from challenge to the earliest time  
121 point at which the maximum symptom score was reached. Duration of symptoms was defined as  
122 the time from challenge to the last non-zero symptom score or to the end of follow-up,  
123 whichever occurred sooner. The association between treatment cohort and clinical data was  
124 assessed with Mann-Whitney *U* tests in RStudio v1.1.447 (42).

125 Previous analyses found no association between inoculum dose and probability of  
126 infection. Given infection, inoculum dose was not associated with disease outcome or the  
127 amount of viral shedding (34). We thus did not stratify any of our analyses by subject inoculum  
128 dose.

129 *Generation of sequence data.* Samples that were IAV positive by cell culture or quantitative PCR  
130 were further processed for whole genome sequencing. In brief, the eight genomic RNA segments  
131 of IAV were reverse-transcribed and PCR amplified using a multi-segment RT-PCR (39) from  
132 whole RNA extracted from nasopharyngeal samples. Individual samples were then barcoded  
133 twice using the sequence independent single primer amplification (SISPA) method (40), which  
134 involves a primer extension step with a Klenow fragment (37°C for 60 minutes, 75°C for 10  
135 minutes and 4°C hold) [New England Biolabs] and PCR amplification with a DNA polymerase  
136 (Preheat at 94°C for 2 minutes followed by 45 cycles of 94°C for 30 seconds, 55°C for 30  
137 seconds and 68°C for 30 seconds with a final extension time of 68°C for 10 minutes and a 4°C  
138 hold) [Gotaq, Promega]. To reduce chimerism, PCR products were treated with exonuclease I  
139 (37°C for 60 minutes). Separately, a parallel SISPA was performed from the same sample set,  
140 but was not treated with exonuclease I. Samples treated with or without exonuclease I were  
141 pooled separately and sequenced on an Illumina HiSeq 2000 instrument (Paired-end sequencing;

142 2 × 100 bp read). SISPA barcoded reads were then demultiplexed and merged based on the  
143 barcode sequence, followed by primer and barcode removal and quality trimming using an in-  
144 house script at the JCVI. Sequencing runs with or without exonuclease I were used as technical  
145 replicates.

146 *Sequence data analysis.* PCR chimeras were removed using a python v2.7 (43) script by  
147 identifying forward and reverse reads from the same DNA fragment with conflicting barcodes.  
148 Following the removal of chimeric reads, FastQC v0.11.3 (44) was performed on all samples to  
149 ensure sequencing quality. Kraken2 v2.0.8-beta (45) with a complete RefSeq viral database was  
150 used to identify reads assigned to influenza A, which were then further quality trimmed with  
151 Trimmomatic v0.38 (46). Leading or trailing bases with quality < 3 were removed. Reads were  
152 cut when the average quality per base in 4-base wide sliding windows was < 15, and reads with  
153 less than 50 bases were excluded. Reads were aligned to the reference strain (GenBank  
154 CY114381 - CY114388) using STAR v2.7.0e (47). A STAR pre-indexing string of length six  
155 was used to generate genome indexing files. SAM files including only uniquely mapped reads  
156 were converted to BAM files which were sorted and indexed using SAMtools v1.9 and HTSlib  
157 v1.9 (48). Single-nucleotide polymorphisms (SNPs) were called using the BCFtools v1.9 (48)  
158 “mpileup,” “call,” and “norm” commands. Only reads with mapping quality ≥ 255 (uniquely  
159 mapped) and bases with quality ≥ 20 were used. BCFtools “consensus” was used to generate  
160 sample-specific reference genomes including SNPs present in more than 50% of the high-quality  
161 reads at a given position. Reads were aligned to sample-specific reference genomes using STAR  
162 in basic two pass mode. BAM files including only primary alignments were generated using  
163 SAMtools. PCR duplicates were marked and removed using Picard Tools v2.20.02 (49).



164 Read depth and read length statistics of the final BAM files were calculated using the  
165 SAMtools “depth” and “view” commands along with a simple bash script. Read depth and length  
166 statistics were combined for both sequencing runs (with and without exonuclease) for the final  
167 analysis.

168 *DVG identification.* Split reads (reads with segments mapping to unique locations in the gene  
169 implying the presence of large internal deletions) were identified using a Python v2.7 script and  
170 pysam 0.15.2 (<https://github.com/pysam-developers/pysam>). Split reads with at least 15  
171 alignment matches to the reference, a minimum of five consecutive alignment reference matches,  
172 no more than three small indels, and a minimum of 100 consecutive deleted reference bases were  
173 used to generate a filtered BAM file. Junction sites for individual DVGs were identified from the  
174 “jI” SAM tag, tabulated, and normalized to the total number of reads aligned to that gene  
175 segment (norm. DVG reads) using a bash script. Split read depth was calculated using the  
176 SAMtools “depth” command.

177 In order to reduce the number of spurious DVGs, we included only DVGs on a per  
178 sample-day basis which were identified in both sequencing runs (with and without exonuclease  
179 I) in the final analysis. Raw and normalized DVG read support measurements were combined  
180 between the technical replicates. All bioinformatic analyses were performed at the Pittsburgh  
181 Supercomputing Center using the Bridges resources.

182 We define a “DVG species” as DVGs with identical deletion breakpoints and “DVG  
183 populations” as all of the observed DVG species within a sample. DVG species are identified by  
184 the first and last reference bases deleted (first\_last). DVG load for a given gene segment is  
185 defined as the sum of the normalized DVG read count for all observed DVGs. DVG load for all  
186 gene segments is the average of the normalized DVG read count over the eight genes. The effect

187 of treatment cohort on peak DVG load was assessed using a Mann-Whitney  $U$  test calculated in  
188 RStudio. The association between DVG presence on different gene segments was assessed using  
189 Fisher's exact test calculated in RStudio.

190 *DVG diversity calculation.* To evaluate the degree of DVG diversity within a sample while  
191 adjusting for the variable number of observed DVG species, we utilized Pielou's evenness index  
192 (50), given by  $\frac{-\sum_{i=1}^s p_i \ln p_i}{\ln s}$  where  $s$  is the number of DVG species and  $p_i$  is the proportion of  
193 DVG reads which support that DVG species. An evenness of 1 corresponds to a population in  
194 which all observed species are present at the same frequency. This metric was calculated in  
195 RStudio.

196 All figures were generated in RStudio using ggplot2 v3.1.0 (51) and cowplot v0.9.3 (52).

197 Raw sequencing data are accessible under NCBI BioProject PRJNA577644. Scripts used  
198 for the generation of data and figures in this report are available at  
199 [https://github.com/koellelab/IAV\\_human\\_challenge\\_study\\_code](https://github.com/koellelab/IAV_human_challenge_study_code).

## 200 **Results**

201 *Data summary.* Of the 37 participants in the human challenge studies, 17 were successfully  
202 infected and had at least one sample successfully sequenced. Seven of these 17 individuals  
203 belonged to the early treatment cohort; the remaining ten belonged to the standard treatment  
204 cohort. Peak viral titers ranged from 1.75 to 6.25  $\log_{10}(\text{TCID}_{50}/\text{mL})$  (mean [population standard  
205 deviation (sd)]: 4.5 [1.2]  $\log_{10}(\text{TCID}_{50}/\text{mL})$ ) and occurred 24 to 120 hours post-challenge (mean  
206 [sd]: 58 [26] hours)). Peak viral titer did not appear to differ between the early and standard  
207 treatment group (mean [sd]: 4.3 [1.5] v. 4.6 [0.8]  $\log_{10}(\text{TCID}_{50}/\text{mL})$ ; p-value = 0.922). However,  
208 those in the early treatment cohort tended to reach peak viral titer faster (cohort (mean [sd]: 48

209 [20] v. 65 [27] hours; p-value = 0.080) and tended to have shorter durations of infection (mean  
210 [sd]: 74 [22] v. 118 [37] hours; p-value = 0.035; Figure S1a, Table S1, Table S2).

211 Peak total symptom scores ranged from 1 to 16 (mean [sd]: 6.5 [4.8]) and did not differ  
212 significantly between treatment cohorts (p-value = 0.922). Time to peak symptom score was  
213 shorter in the early treatment cohort (mean [sd]: 29 [14] v. 59 [18]; p-value = 0.003) as was the  
214 duration of symptoms (mean [sd]: 83 [37] v. 134 [17]; p-value: 0.005). Cumulative symptom  
215 scores were highly variable between subjects and no difference was observed between the two  
216 cohorts (mean [sd]: 43 [50] v. 35 [29]; p-value = 0.922; Figure S1b, Table S1, Table S2).

217 A total of 43 samples, including the inoculum, were successfully deep-sequenced. The  
218 number of successfully sequenced samples per subject ranged from one to five (Figure 1A).  
219 Following read trimming, the per-sample, per-gene average read length ranged from 70 to 72  
220 nucleotides (nt). The average genome-wide read depth was 118 reads (range: 63 to 166) (Table  
221 S3, Figure S2A, Figure S2B).

222 *Widely observed de novo DVGs.* DVGs in the challenge stock were largely absent, identified at  
223 only low levels in the NP, NA, and NS gene segments and absent from the other gene segments  
224 (Figure S3). On the contrary, DVGs were observed in all but one successfully infected subject  
225 (Figure 1). For the subject in which no DVGs were detected (subject 5017), only a single sample  
226 (day two) was sequenced. This subject was in the early treatment cohort and was also positive  
227 for influenza on day three, however, this sample was not successfully sequenced.

228 Amongst the other subjects, we observed DVGs in at least one of IAV's eight gene  
229 segments in 38/41 successfully sequenced samples. As expected, DVGs were more commonly  
230 observed in the polymerase genes (PB2 (n = 31), PB1 (n = 28), and PA (n = 26) v. HA (n=7), NP  
231 (n = 7), NA (n = 12), M (5), and NS (10)). DVGs were observed as early as day one and as late

232 as day six post challenge. We did not observe a difference in peak DVG load between treatment  
233 cohorts (p-value: 0.713).

234 Normalized DVG read counts, a proxy for the number of DVGs relative to wild-type  
235 virus *in vivo*, ranged from 0.0004 to 0.064 (Table S4, Figure S2C). Among samples with DVGs,  
236 deletions in polymerase genes tended to have higher normalized DVG counts, indicating the  
237 presence of more DVGs generated from these segments within a given host. Presence of DVGs  
238 in the PB2, PB1, and PA gene segments were positively associated with one another (PB2 × PB1  
239 p-value:  $2.5 \times 10^{-6}$ ; PB2 x PA p-value:  $5.2 \times 10^{-3}$ ; PB1 x PA p-value:  $2.5 \times 10^{-3}$ ; Figure S4).

240 To determine whether certain junction locations were favored in identified DVG species,  
241 we tabulated the most commonly observed 3' and 5' junction sites (Figure S5, Table S5).  
242 Unsurprisingly, most 3' junction locations were located in the first 500 nt of each gene and the 5'  
243 junction locations in the last 500 nt of each gene. We observed no junction locations within 40 nt  
244 of either end of the three polymerase genes, consistent with the theory that the sequences at  
245 either end are necessary for replication (12–15) and virion packaging (16–18). The mean [sd]  
246 (weighted by normalized DVG read support) number of deleted nucleotides was comparable  
247 between gene segments (PB2: 1646 [392]; PB1: 1625 [397], PA: 1593 [332]). A small number of  
248 DVGs were observed with 3' junction sites located towards the 5' end of a given gene segment.  
249 With the exception of a single PB2 DVG, these tended to be found in a small number of samples  
250 with low normalized DVG read support. However, 1482\_2101 in PB2 was observed in 0.0045  
251 and 0.0068 normalized reads in subject 5020 on days two and four, respectively. This was the  
252 dominant DVG present at day two and one of a number of codominant DVGs present at day  
253 four.

254 We observed the presence of identical DVG species across both samples and subjects in  
255 the PB2 (n = 16), PB1 (n = 13), PA (n = 13), NP (n = 2), NA (n = 2), and NS (n = 1) genes  
256 (Table S6). Repeat DVGs were most commonly present in multiple samples from the same  
257 subject (n = 37). For example, the PB2 deletion from nt 356 to nt 1937 in the reference sequence  
258 was observed in subject 5021 at four consecutive time points (day two through day five).  
259 However, a number were also present in multiple subjects (n = 10). For example, DVG 476\_703  
260 in the PB2 gene segment was observed in subject 5006 at day one, subjects 5019 and 5020 at day  
261 2, and subject 5021 at day three. DVG 696\_1378 in the NP gene segment was observed in the  
262 challenge stock as well as in subject 5002 (day two) and subject 5019 (day two and three, but not  
263 one). Given its identification in only these 4 samples, it is unclear whether this DVG was  
264 transmitted during challenge or whether it appeared *de novo* in these two subjects (with lack of  
265 detection on day one in subject 5019).

266 *Dynamic within-host DVG populations.* Due to the longitudinal nature of these data, we wished  
267 to analyze whether systematic changes in the DVG populations within individual hosts were  
268 evident. Specifically, we looked at the population composition within hosts to determine whether  
269 there was evidence of positive selection for specific DVG species or for changes in the  
270 composite characteristics of DVG populations. However, given the acute nature of the infections  
271 in this study, any positive selection may be overwhelmed by stochastic effects, as has been  
272 previously described for point mutations in acute influenza infections (53).

273 Our analyses revealed that the composition of DVG populations changed rapidly within-  
274 hosts. Individual DVG species were found to rise and fall in their relative read support, and DVG  
275 species arose and disappeared throughout the course of infection (Figure S6). For example, in  
276 subject 013 the number of individual DVG species increased notably between days two and

277 three, more than doubling in the PB2 and PB1 genes (Figure 2A). However, in general the DVGs  
278 observed at day two were still present in the sample at day three. Considerably different  
279 dynamics were observed in subject 5021 (Figure S6), from which we have data for day one  
280 through four. DVG populations in this subject underwent considerable turnover on day three.  
281 Amongst the two PB2 DVGs observed at day two, neither were observed at day three. However,  
282 one of these two was observed again at day four. Similar dynamics were observed in both the  
283 PB1 gene (in which no DVGs were observed at day three) and the PA gene (in which a unique  
284 DVG was observed only at day three).

285         The generation of novel DVG species between sampling timepoints was very common.  
286 However, in most cases at any given time point a small number of DVG species accounted for  
287 the majority of the relative read support. In certain cases, these dominant DVG species were  
288 consistent between time points, however in others the dominant DVG species varied  
289 considerably between time points. This suggests that while many different DVG species can be  
290 formed during viral replication, stochastic effects during DVG generation or a selective  
291 advantage of certain DVG species leads to the observed DVG species unevenness within hosts at  
292 any given time point.

293         To quantitatively assess whether there was evidence for selection for specific DVG  
294 species, we determined the trajectory of DVG diversity, measured by Pielou's evenness ( $J'$ ), over  
295 the course of infection in individual subjects (Figure 2B). We did not observe a trend towards  
296 decreasing diversity over the course of infection. For example, amongst PB2 DVGs, subject  
297 5004 as well as subject 5021 witnessed net decreases in DVG diversity overtime whereas there  
298 was limited change in  $J'$  for subjects 012 and 5006. Subject 5019 experienced only a transient  
299 reduction in diversity on day two when the DVG population was dominated by a single DVG

300 (172\_2079). In contrast, subject 5020 experienced a transient increase in diversity on days two  
301 and three. Similar stochastic patterns of diversity were also observed in PB1 and PA DVGs.

302 It has been proposed that DVG species are preferentially replicated over wild-type virus  
303 due to their shorter length (22). Therefore, it is reasonable to hypothesize that selection might  
304 lead to the evolution of shorter DVG species over the course of infection. To address this  
305 hypothesis, we analyzed the number of reference bases deleted over the course of infection  
306 amongst those subjects with DVGs in a specific gene at multiple time points (Figure S7). Our  
307 data indicated no systematic change in DVG length over the course of infection (Figure 2C,  
308 Figure S8). In certain subjects, DVGs tended to get shorter (subject 5004 PB2, subject 5019 PB1,  
309 subject 5020 PB2), however in others there was no discernible change in DVG length (subject  
310 012 PB2 and PB1, subject 5002 PA). These results suggest that either genetic drift overwhelms  
311 selective forces or that factors other than DVG length more strongly affect DVG fitness.

312 *Correlation between DVG presence and clinical data.* While this study was not powered to  
313 detect statistically significant associations between the presence of DVGs and clinical data, we  
314 wished to see if there were any qualitative correlations. We first analyzed the relationship  
315 between peak viral titer and the peak DVG load within a subject (Figure 3A), expecting a  
316 positive correlation as wild-type virus is necessary for the replication of DVGs. We were unable  
317 to detect an association between the two measures in this study. The cyclical nature of relative  
318 DVG abundance is well established *in vitro* (6) and it is possible that while wild-type virus is  
319 necessary for DVG replication, the inhibitory effect of DVG replication on the amount of wild-  
320 type virus which is replicated (thereby reducing peak viral titers) obscures any obvious  
321 correlation between the two.

322 Previous reports have suggested an association between DVG presence and IAV clinical  
323 outcomes (9). While none of the subjects in this controlled challenge study experienced severe  
324 clinical outcomes, we analyzed the association between self-reported symptom scores and DVG  
325 presence. As DVGs are thought to dampen the clinical manifestation of IAV infection, we  
326 expected high DVG levels to be associated with less severe symptom scores. However, we were  
327 unable to detect an association between peak DVG load and peak symptom score in this study  
328 (Figure 3B). This lack of association may be due to the contrasting effects of DVGs interfering  
329 with wild-type virus replication and packaging and their activation of the innate immune  
330 response (25, 26), which is known to be responsible for influenza symptom manifestation.  
331 Furthermore, our inability to find an association between DVG load and symptoms may be  
332 because the seasonal IAV strain used in this study is relatively avirulent and all subjects were  
333 healthy, leading to relatively mild clinical presentations.

### 334 **Discussion**

335 The presence of defective influenza genomes has been well characterized in cell cultures (2–7)  
336 and animal models (25). Influenza DVGs have also been observed in clinical human H1N1  
337 samples (8). However, to date, no studies have performed longitudinal analyses of naturally  
338 occurring DVG populations within humans. Here we presented an analysis of DVG populations  
339 in samples from two H3N2 human challenge studies with different treatment protocols for up to  
340 seven days post-challenge.

341 Our analysis supports prior findings that DVG presence is nearly universal and most  
342 commonly found on the polymerase gene segments (8), both in terms of presence/absence as  
343 well as abundance. Furthermore, we observed that DVGs are often found on multiple polymerase  
344 genes within the same subject. The timing of oseltamivir treatment was not found to affect the



345 peak viral titer, peak symptom score, or cumulative symptom scores, nor did it effect the  
346 accumulation of DVGs within a host. We observed identical DVG species within single hosts at  
347 multiple time points as well as across multiple hosts. As identical DVG species were more likely  
348 to be observed within, as opposed to between hosts, this implies that ongoing within-host  
349 replication of DVG species following their stochastic generation is likely driving this  
350 phenomenon.

351 DVG populations were shown to be to be highly dynamic in terms of both the DVG  
352 species they comprised and the abundance levels of these species. There was no evidence for  
353 decreased diversity of DVG populations within a host over the course of infection. Furthermore,  
354 we saw no trend towards DVG species becoming on average shorter over time. These results  
355 imply that *in vivo* genetic drift may be overwhelming selective forces in shaping the evolutionary  
356 dynamics of DVG species in this study. IAV genetic drift playing a strong role in these human  
357 challenge studies is not unanticipated, given that the challenge reference strain was a seasonal  
358 influenza strain that was relatively well adapted to human hosts and that egg- and cell culture-  
359 adapted variants were quickly excluded from the *in vivo* viral populations (31). The effect of  
360 spatial structure within the host respiratory system (54) may further augment the effects of  
361 genetic drift on DVG populations.

362 We did not observe an association between peak viral titer or peak symptom score and  
363 peak DVG loads. This points to the complex feedback mechanisms which govern the amount of  
364 DVG and wild-type virus within a host as well as between the replicative inhibitory effect of  
365 DVG generation on wild-type virus replication and the interaction between DVGs and the host  
366 immune response.

367           This analysis has several limitations, largely due to the nature of the available data. The  
368 sequencing reads were generated in 2013 and therefore read lengths are shorter and mean read  
369 coverage is lower than in more recently generated viral deep sequencing datasets. Furthermore,  
370 we did not confirm the presence of DVG species using PCR, as has been done in other studies  
371 (8) because samples from these human challenge studies are no longer available. Furthermore, a  
372 certain level of noise in the bioinformatics pipeline used to identify DVGs is to be expected. In  
373 order to reduce this noise we analyzed only DVG species present in both technical replicates  
374 (with and without exonuclease I), however, we opted not to remove DVG species with low  
375 supporting read counts as has been previously proposed (55) in order to maintain sensitivity in  
376 our measure of DVG diversity. The very low number of split reads observed in the non-  
377 polymerase genes, which are known to rarely form DVGs, implies that the level of noise in our  
378 analysis is relatively low.

379           Furthermore, sequencing data were only available at most once per day for each subject  
380 and therefore we were unable to assess the fine-scale evolution of DVG species. This sparse  
381 sampling is likely why observed DVG populations were so variable between time points. With  
382 more frequent sampling we predict it would be possible to observe more gradual transitions  
383 between DVG population compositions within a host.

384           Despite these limitations, this study adds to the growing body of evidence that influenza  
385 DVGs are present during human infections and evolve over the course of infection. While the  
386 expansion of DVGs in individual infections are surely impacted by wild-type viral dynamics,  
387 whether DVGs in turn play a role in shaping infection dynamics and determining disease  
388 progression remains an open question.

389 Further studies with greater temporal resolution and sequencing to a higher read depth  
390 may help to more precisely characterize the evolutionary trajectory of DVG populations within  
391 individual hosts. Analysis of the most common DVG species observed in future studies may  
392 reveal factors that impact DVG stability over the course of an infection. A thorough  
393 understanding of the interaction between wild-type virus, DVGs, and the host immune response  
394 may ultimately aid in the development of therapeutics based on exogenous DIPs.

### 395 **Acknowledgements**

396 We thank Ashley Sobel Leonard for guidance in accessing and interpreting the available  
397 sequence data; Katherine E. E. Johnson, Tim Song, and Elodie Ghedin for explaining their DVG  
398 identification pipeline, which was adapted for this analysis; Fadi G. Alnaji and Christopher B.  
399 Brooke for their advice on the identification of DVGs from Illumina sequencing data; and David  
400 E. Wentworth for his assistance in interpreting the JCVI sequencing methods used to generate  
401 the data analyzed here. This work used the Extreme Science and Engineering Discovery  
402 Environment (XSEDE) Bridges Regular Memory resource at the Pittsburgh Supercomputing  
403 Center (56) and was funded by the US Defense Advanced Research Projects Agency (DARPA)  
404 INTERCEPT W911NF-17-2-0034 contract. The funding for the challenge studies was provided  
405 by DARPA contract NC66001-07-C-2024. Work was partially funded by the National Institute  
406 of Allergy and Infectious Diseases, National Institute of Health award numbers  
407 HHSN272200900007C and U19AI110819).

408 **References**

- 409 1. von Magnus P. 1954. Incomplete forms of influenza virus. *Adv Virus Res* 2:59–79.
- 410 2. Davis AR, Nayak DP. 1979. Sequence relationships among defective interfering influenza  
411 viral RNAs. *Proc Natl Acad Sci U S A* 76:3092–6.
- 412 3. Nayak DP, Chambers TM, Akkina RK. 1985. Defective-interfering (DI) RNAs of  
413 influenza viruses: origin, structure, expression, and interference. *Curr Top Microbiol*  
414 *Immunol* 114:103–151.
- 415 4. Marcus PI, Ngunjiri JM, Sekellick MJ. 2009. Dynamics of Biologically Active  
416 Subpopulations of Influenza Virus: Plaque-Forming, Noninfectious Cell-Killing, and  
417 Defective Interfering Particles. *J Virol* 83:8122–8130.
- 418 5. Janda JM, Davis AR, Nayak DP, De BK. 1979. Diversity and generation of defective  
419 interfering influenza virus particles. *Virology* 95:48–58.
- 420 6. Kantorovich-Prokudina EN, Semyonova NP, Berezina ON, Zhdanov VM. 1980. Gradual  
421 changes of influenza virions during passage of undiluted material. *J Gen Virol* 50:23–31.
- 422 7. Nayak DP, Tobita K, Janda JM, Davis a R, De BK. 1978. Homologous interference  
423 mediated by defective interfering influenza virus derived from a temperature-sensitive  
424 mutant of influenza virus. *J Virol* 28:375–86.
- 425 8. Saira K, Lin X, DePasse J V., Halpin R, Twaddle A, Stockwell T, Angus B, Cozzi-Lepri  
426 A, Delfino M, Dugan V, Dwyer DE, Freiberg M, Horban A, Losso M, Lynfield R,  
427 Wentworth DN, Holmes EC, Davey R, Wentworth DE, Ghedin E. 2013. Sequence  
428 Analysis of In Vivo Defective Interfering-Like RNA of Influenza A H1N1 Pandemic  
429 Virus. *J Virol* 87:8064–8074.
- 430 9. Vasilijevic J, Zamarreño N, Oliveros JC, Rodriguez-Frandsen A, Gómez G, Rodriguez G,

- 431 Pérez-Ruiz M, Rey S, Barba I, Pozo F, Casas I, Nieto A, Falcón A. 2017. Reduced  
432 accumulation of defective viral genomes contributes to severe outcome in influenza virus  
433 infected patients. *PLoS Pathog* 13:1–29.
- 434 10. Huang a. S, Baltimore D. 1970. Defective viral particles and viral disease processes.  
435 *Nature* 226:325–327.
- 436 11. Davis AR, Hiti AL, Nayak DP. 1980. Influenza defective interfering viral RNA is formed  
437 by internal deletion of genomic RNA. *Proc Natl Acad Sci U S A* 77:215–219.
- 438 12. Li X, Palese P. 1992. Mutational analysis of the promoter required for influenza virus  
439 virion RNA synthesis. *J Virol* 66:4331–4338.
- 440 13. Piccone ME, Fernandez-Sesma A, Palese P. 1993. Mutational analysis of the influenza  
441 virus vRNA promoter. *Virus Res* 28:99–112.
- 442 14. Flick R, Gabriele N, Hoffmann E, Neumeier E, Hobom G. 1996. Promoter elements in the  
443 influenza vRNA terminal structure. *RNA* 2:1046–1057.
- 444 15. Crow M, Crow M, Deng T, Deng T, Addley M, Addley M, Brownlee GG, Brownlee GG.  
445 2004. Mutational Analysis of the Influenza Virus cRNA Promoter and Identifi cation of  
446 Nucleotides Critical for Replication. *Society* 78:6263–6270.
- 447 16. Watanabe T, Watanabe S, Noda T, Fujii Y, Kawaoka Y. 2003. Exploitation of Nucleic  
448 Acid Packaging Signals To Generate a Novel Influenza Virus-Based Vector Stably  
449 Expressing Two Foreign Genes. *J Virol* 77:10575–10583.
- 450 17. Fujii K, Fujii Y, Noda T, Muramoto Y, Watanabe T, Takada A, Goto H, Horimoto T,  
451 Kawaoka Y. 2005. Importance of both the coding and the segment-specific noncoding  
452 regions of the influenza A virus NS segment for its efficient incorporation into virions. *J*  
453 *Virol* 79:3766–3774.

- 454 18. Liang Y, Hong Y, Parslow TG, Liang Y, Hong Y, Parslow TG. 2005. cis -Acting  
455 Packaging Signals in the Influenza Virus PB1 , PB2 , and PA Genomic RNA Segments cis  
456 -Acting Packaging Signals in the Influenza Virus PB1 , PB2 , and PA Genomic RNA  
457 Segments. *J Virol* 79:10348–10355.
- 458 19. Jennings PA, Finch JT, Winter G, Robertson JS. 1983. Does the higher order structure of  
459 the influenza virus ribonucleoprotein guide sequence rearrangements in influenza viral  
460 RNA? *Cell* 34:619–627.
- 461 20. Noble S, Dimmock NJ. 1995. Characterization of putative defective interfering (DI)  
462 A/WSN RNAs isolated from the lungs of mice protected from an otherwise lethal  
463 respiratory infection with influenza virus A/WSN (H1N1): A subset of the inoculum DI  
464 RNAs. *Virology*.
- 465 21. Brooke CB. 2014. Biological activities of “noninfectious” influenza A virus particles.  
466 *Future Virol* 9:41–51.
- 467 22. Wu C a, Harper L, Ben-Porat T. 1986. Molecular basis for interference of defective  
468 interfering particles of pseudorabies virus with replication of standard virus. *J Virol*  
469 59:308–17.
- 470 23. Duhaut SD, McCauley JW. 1996. Defective RNAs inhibit the assembly of influenza virus  
471 genome segments in a segment-specific manner. *Virology* 216:326–337.
- 472 24. Odagiri T, Tashiro M. 1997. Segment-specific noncoding sequences of the influenza virus  
473 genome RNA are involved in the specific competition between defective interfering RNA  
474 and its progenitor RNA segment at the virion assembly step. *J Virol* 71:2138–45.
- 475 25. Tapia K, Kim W keun, Sun Y, Mercado-López X, Dunay E, Wise M, Adu M, López CB.  
476 2013. Defective Viral Genomes Arising In Vivo Provide Critical Danger Signals for the

- 477            Triggering of Lung Antiviral Immunity. *PLoS Pathog* 9.
- 478    26.    Scott PD, Meng B, Marriott AC, Easton AJ, Dimmock NJ. 2011. Defective interfering  
479            influenza virus confers only short-lived protection against influenza virus disease:  
480            Evidence for a role for adaptive immunity in DI virus-mediated protection in vivo.  
481            *Vaccine* 29:6584–6591.
- 482    27.    Dimmock NJ, Rainsford EW, Scott PD, Marriott AC. 2008. Influenza Virus Protecting  
483            RNA: an Effective Prophylactic and Therapeutic Antiviral. *J Virol* 82:8570–8578.
- 484    28.    Mann A, Marriott AC, Balasingam S, Lambkin R, Oxford JS, Dimmock NJ. 2006.  
485            Interfering vaccine (defective interfering influenza A virus) protects ferrets from  
486            influenza, and allows them to develop solid immunity to reinfection. *Vaccine* 24:4290–  
487            4296.
- 488    29.    Noble S, Dimmock NJ. 1994. Defective interfering type A equine influenza virus (H3N8)  
489            protects mice from morbidity and mortality caused by homologous and heterologous  
490            subtypes of influenza A virus. *J Gen Virol* 75:3485–3491.
- 491    30.    Noble S, McLain L, Dimmock NJ. 2004. Interfering vaccine: A novel antiviral that  
492            converts a potentially virulent infection into one that is subclinical and immunizing.  
493            *Vaccine* 22:3018–3025.
- 494    31.    Sobel Leonard A, McClain MT, Smith GJD, Wentworth DE, Halpin RA, Lin X, Ransier  
495            A, Stockwell TB, Das SR, Gilbert AS, Lambkin-Williams R, Ginsburg GS, Woods CW,  
496            Koelle K. 2016. Deep Sequencing of Influenza A Virus from a Human Challenge Study  
497            Reveals a Selective Bottleneck and Only Limited Intra-host Genetic Diversification. *J*  
498            *Virol* 90:11247–11258.
- 499    32.    Sobel Leonard A, McClain MT, Smith GJD, Wentworth DE, Halpin RA, Lin X, Ransier

- 500 A, Stockwell TB, Das SR, Gilbert AS, Lambkin-Williams R, Ginsburg GS, Woods CW,  
501 Koelle K, Illingworth CJR. 2017. The effective rate of influenza reassortment is limited  
502 during human infection. *PLoS Pathog* 13:1–26.
- 503 33. Zaas AK, Chen M, Varkey J, Veldman T, Hero AO, Lucas J, Huang Y, Turner R, Gilbert  
504 A, Lambkin-Williams R, Øien NC, Nicholson B, Kingsmore S, Carin L, Woods CW,  
505 Ginsburg GS. 2009. Gene Expression Signatures Diagnose Influenza and Other  
506 Symptomatic Respiratory Viral Infections in Humans. *Cell Host Microbe* 6:207–217.
- 507 34. Huang Y, Zaas AK, Rao A, Dobigeon N, Woolf PJ, Veldman T, Øien NC, McClain MT,  
508 Varkey JB, Nicholson B, Carin L, Kingsmore S, Woods CW, Ginsburg GS, Hero AO.  
509 2011. Temporal dynamics of host molecular responses differentiate symptomatic and  
510 asymptomatic influenza a infection. *PLoS Genet* 7.
- 511 35. Moody MA, Zhang R, Walter EB, Woods CW, Ginsburg GS, McClain MT, Denny TN,  
512 Chen X, Munshaw S, Marshall DJ, Whitesides JF, Drinker MS, Amos JD, Gurley TC,  
513 Eudailey JA, Foulger A, DeRosa KR, Parks R, Meyerhoff RR, Yu JS, Kozink DM,  
514 Barefoot BE, Ramsburg EA, Khurana S, Golding H, Vandergrift NA, Alam SM, Tomaras  
515 GD, Kepler TB, Kelsoe G, Liao HX, Haynes BF. 2011. H3N2 influenza infection elicits  
516 more cross-reactive and less clonally expanded anti-hemagglutinin antibodies than  
517 influenza vaccination. *PLoS One* 6.
- 518 36. Zaas AK, Burke T, Chen M, McClain M, Nicholson B, Veldman T, Tsalik EL, Fowler V,  
519 Rivers EP, Otero R, Kingsmore SF, Voora D, Lucas J, Hero AO, Carin L, Woods CW,  
520 Ginsburg GS. 2013. A host-based RT-PCR gene expression signature to identify acute  
521 respiratory viral infection. *Sci Transl Med* 5:1–10.
- 522 37. Woods CW, McClain MT, Chen M, Zaas AK, Nicholson BP, Varkey J, Veldman T,



- 523 Kingsmore SF, Huang Y, Lambkin-Williams R, Gilbert AG, Hero AO, Ramsburg E,  
524 Glickman S, Lucas JE, Carin L, Ginsburg GS. 2013. A Host Transcriptional Signature for  
525 Presymptomatic Detection of Infection in Humans Exposed to Influenza H1N1 or H3N2.  
526 PLoS One 8.
- 527 38. Wilkinson TM, Li CKF, Chui CSC, Huang AKY, Perkins M, Liebner JC, Lambkin-  
528 Williams R, Gilbert A, Oxford J, Nicholas B, Staples KJ, Dong T, Douek DC, McMichael  
529 AJ, Xu X-N. 2012. Preexisting influenza-specific CD4+ T cells correlate with disease  
530 protection against influenza challenge in humans. *Nat Med* 18:274.
- 531 39. Zhou B, Donnelly ME, Scholes DT, St. George K, Hatta M, Kawaoka Y, Wentworth DE.  
532 2009. Single-Reaction Genomic Amplification Accelerates Sequencing and Vaccine  
533 Production for Classical and Swine Origin Human Influenza A Viruses. *J Virol* 83:10309–  
534 10313.
- 535 40. Djikeng A, Halpin R, Kuzmickas R, DePasse J, Feldblyum J, Sengamalay N, Afonso C,  
536 Zhang X, Anderson NG, Ghedin E, Spiro DJ. 2008. Viral genome sequencing by random  
537 priming methods. *BMC Genomics* 9:1–9.
- 538 41. JACKSON G, HF D, IG S, AV B. 1958. Transmission of the common cold to volunteers  
539 under controlled conditions: I. the common cold as a clinical entity. *AMA Arch Intern*  
540 *Med* 101:267–278.
- 541 42. RStudio Team. 2015. RStudio: Integrated Development for R.tle. RStudio, Inc., Boston,  
542 MA.
- 543 43. Python Software Foundation. 2013. Python Language Reference, version 2.7. Python  
544 Softw Found Version 3.03., <http://www.python.org>.
- 545 44. Andrews S. 2010. FastQC: a quality control tool for high throughput sequence data.

- 546 45. Wood DE, Salzberg SL. 2014. Kraken: Ultrafast metagenomic sequence classification  
547 using exact alignments. *Genome Biol* 15.
- 548 46. Bolger AM, Lohse M, Usadel B. 2014. Trimmomatic: A flexible trimmer for Illumina  
549 sequence data. *Bioinformatics* 30:2114–2120.
- 550 47. Dobin A, Davis CA, Schlesinger F, Drenkow J, Zaleski C, Jha S, Batut P, Chaisson M,  
551 Gingeras TR. 2013. STAR: Ultrafast universal RNA-seq aligner. *Bioinformatics* 29:15–  
552 21.
- 553 48. Li H, Handsaker B, Wysoker A, Fennell T, Ruan J, Homer N, Marth G, Abecasis G,  
554 Durbin R. 2009. The Sequence Alignment/Map format and SAMtools. *Bioinformatics*  
555 25:2078–2079.
- 556 49. Broad Institute. 2016. Picard tools. <https://BroadinstituteGithubIo/Picard/>. Broad Institute.
- 557 50. Pielou EC. 1966. The measurement of diversity in different types of biological collections.  
558 *J Theor Biol* 13:131–144.
- 559 51. Wickham H. 2009. *ggplot2: Elegant Graphics for Data Analysis*. Springer-Verlag New  
560 York.
- 561 52. Wilke CO. 2018. *cowplot*.
- 562 53. McCrone JT, Woods RJ, Martin ET, Malosh RE, Monto AS, Lauring AS. 2018.  
563 Stochastic processes constrain the within and between host evolution of influenza virus.  
564 *Elife* 7:1–19.
- 565 54. Gallagher ME, Brooke CB, Ke R, Koelle K. 2018. Causes and Consequences of Spatial  
566 Within-Host Viral Spread. *Viruses* 10:1–23.
- 567 55. Alnaji FG, Holmes JR, Rendon G, Vera JC, Fields, Christopher J.Martin BE, Brooke CB.  
568 2018. Illumina-based sequencing framework for accurate detection and mapping of

- 569 influenza virus defective interfering particle-associated RNAs. bioRxiv.
- 570 56. Towns J, Cockerill T, Dahan M, Foster I, Gaither K, Grimshaw A, Hazelwood V, Lathrop
- 571 S, Lifka D, Peterson GD, Rosies R, Scott JR, Wilkins-Diehr N. 2014. XSEDE:
- 572 Accelerating Scientific Discovery. *Comput Sci Eng* 16:62–74.
- 573

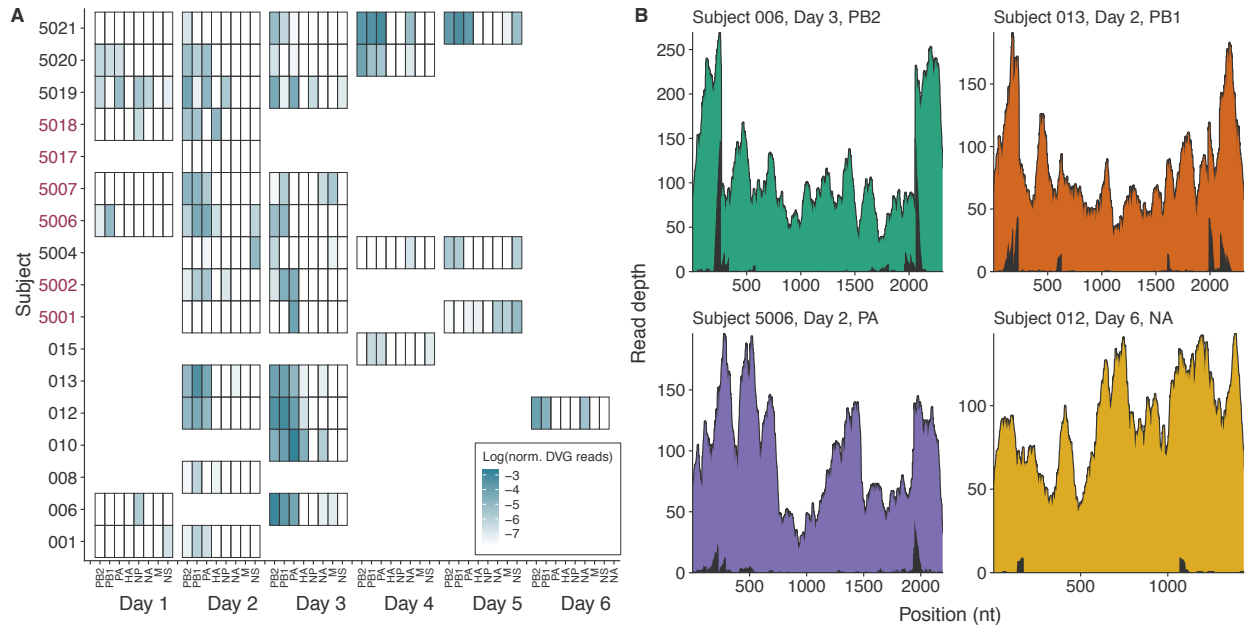

574

575 Figure 1. Graphical summary of the data used in this study. A) Heatmap showing the number of  
576 sequencing reads indicating the presence of defective viral genomes in each gene segment  
577 normalized by the total number of sequencing reads aligned to that gene segment. Rows  
578 represent individual subjects (red text indicates early treatment (oseltamivir on the evening of the  
579 first day post challenge) cohort). Columns represent day of sampling; sub columns indicate gene  
580 segment. White space indicates lack of sequencing data. B) Representative coverage plots in  
581 various gene segments. Background colored area shows the total read depth at a given nucleotide  
582 (nt) position. Black color in the foreground represents the coverage depth of split reads,  
583 indicative of DVGs.

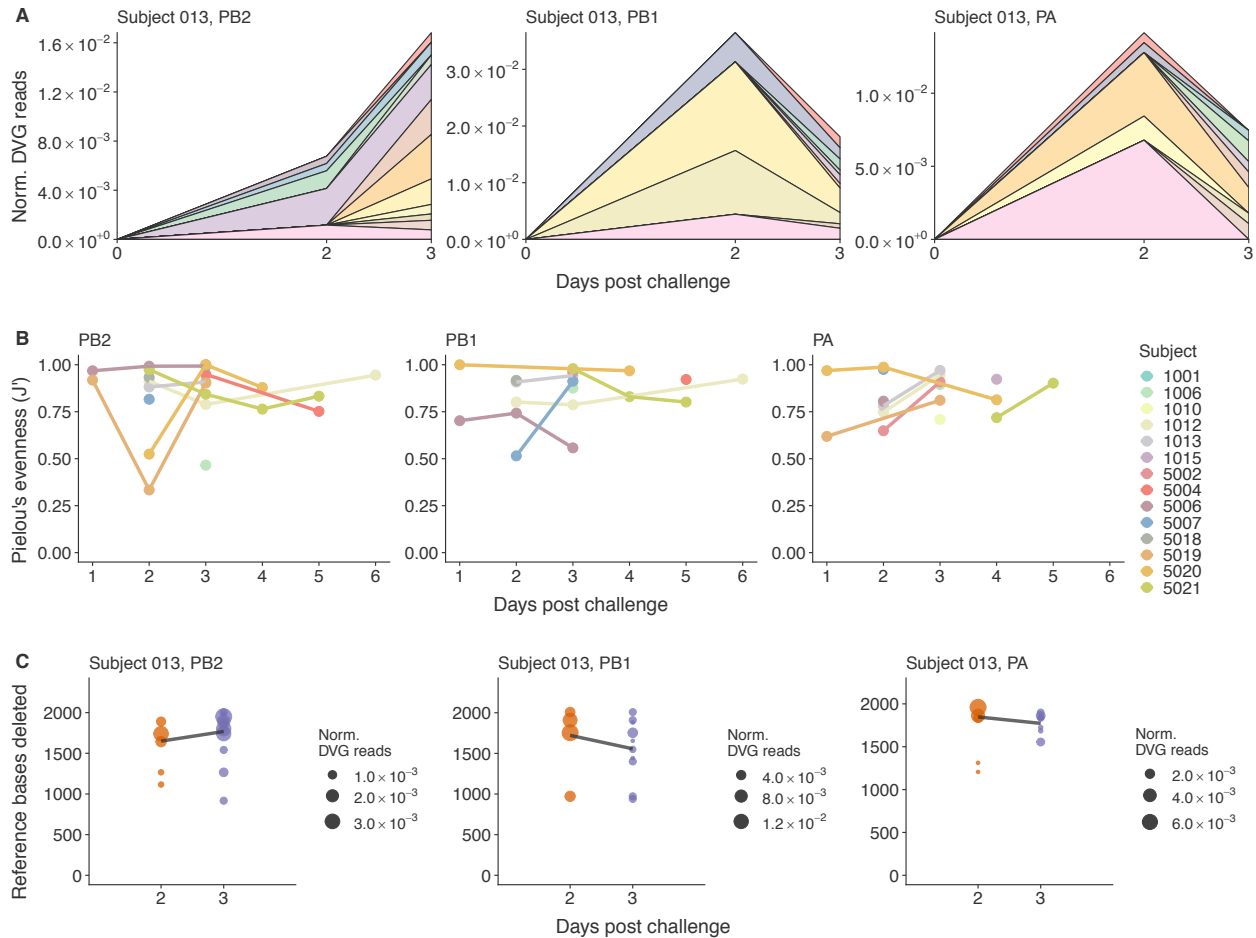

584

585 Figure 2. Population dynamics of observed defective viral genome (DVG) populations. A)

586 Stacked area plots showing the DVG species observed at two and three days post challenge in

587 subject 013 in the PB2, PB1, and PA gene segments. Each color represents an individual DVG

588 species. The height of each region represents the normalized number of DVG reads supporting

589 that DVG. B) Diversity of DVG populations in the PB2, PB1, and PA gene segments for each

590 subject in the study. Lines connect data points from the same subject at multiple time points.

591 Diversity is measured by Pielou's evenness ( $J'$ ), which is given by  $\frac{-\sum_{i=1}^s p_i \ln p_i}{\ln s}$  where  $s$  is the

592 number of DVG species and  $p_i$  is the proportion of DVG reads which support that DVG species.

593 C) Distribution of the number of deleted reference bases in each observed DVG species in the

594 PB2, PB1, and PA gene segments of subjects 013. Dot size represents the normalized number of

595 DVG reads supporting a specific DVG species. Trend lines connect the mean number of  
596 reference bases deleted at each day, weighted by the normalized DVG read support.

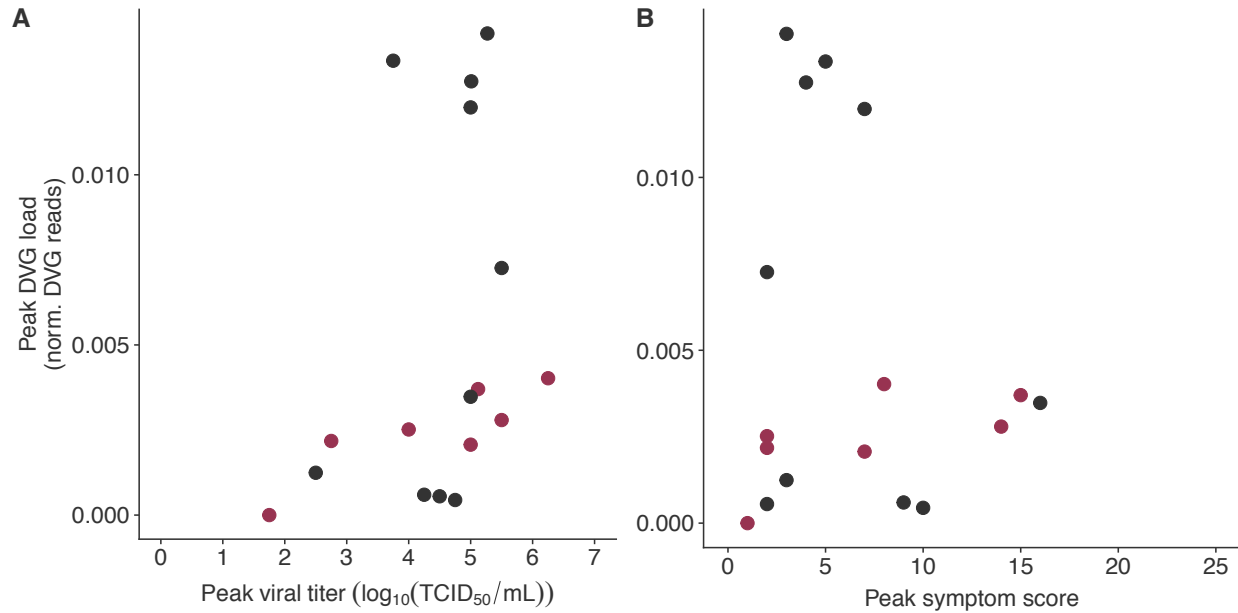

597

598 Figure 3. Dot plots of clinical data against the amount of defective viral genomes (DVGs). Each  
599 dot represents a subject. A) Dot plot showing the lack of association between peak viral titer  
600 (log<sub>10</sub>(TCID<sub>50</sub>/mL) on the x-axis and the peak number of normalized DVG reads on the y-axis.  
601 B) Dot plot showing the lack of association between peak Modified Jackson symptom score on  
602 the x-axis and the peak number of normalized DVG reads on the y-axis.

603 **Supplemental Material**

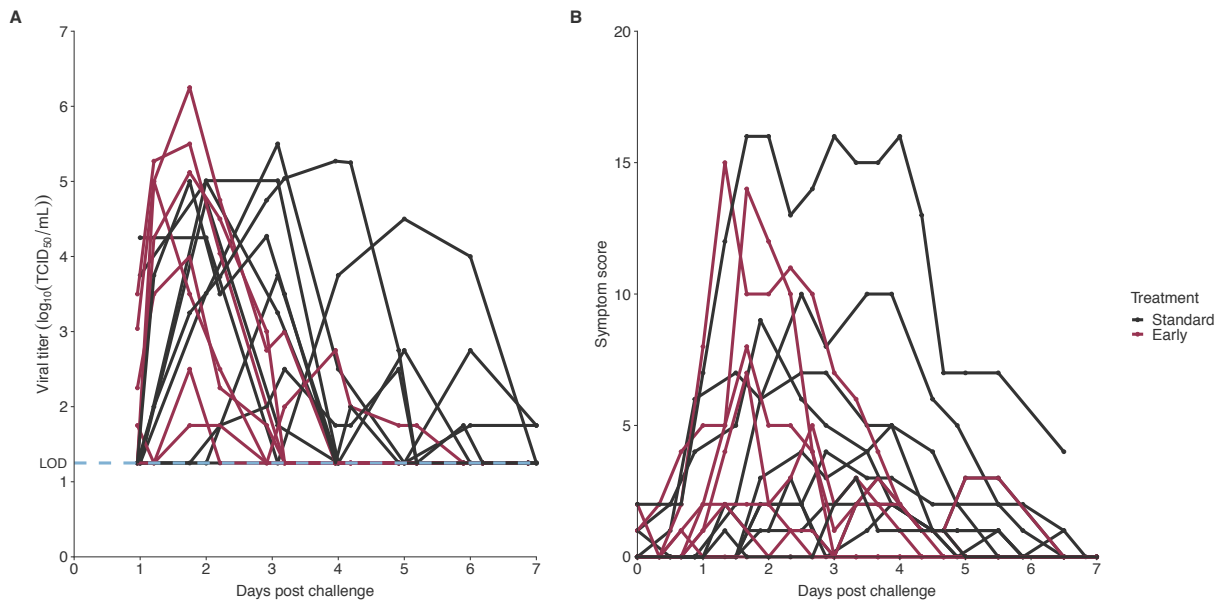

604

605 Figure S1. Clinical data included in the study. Red lines represent subjects in the early treatment  
606 (oseltamivir on the evening of the first day post challenge) cohort, grey lines represent subjects  
607 in the standard treatment (oseltamivir on the evening of the fifth day post challenge) cohort. A)  
608 Viral titer (log<sub>10</sub>(TCID<sub>50</sub>/mL)) measurements for each subject at various time-points post-  
609 challenge. Blue dotted line at 1.25 log<sub>10</sub>(TCID<sub>50</sub>/mL) represents the limit of detection of the  
610 assay used. B) Modified Jackson symptom scores for each subject at various time-points post-  
611 challenge.



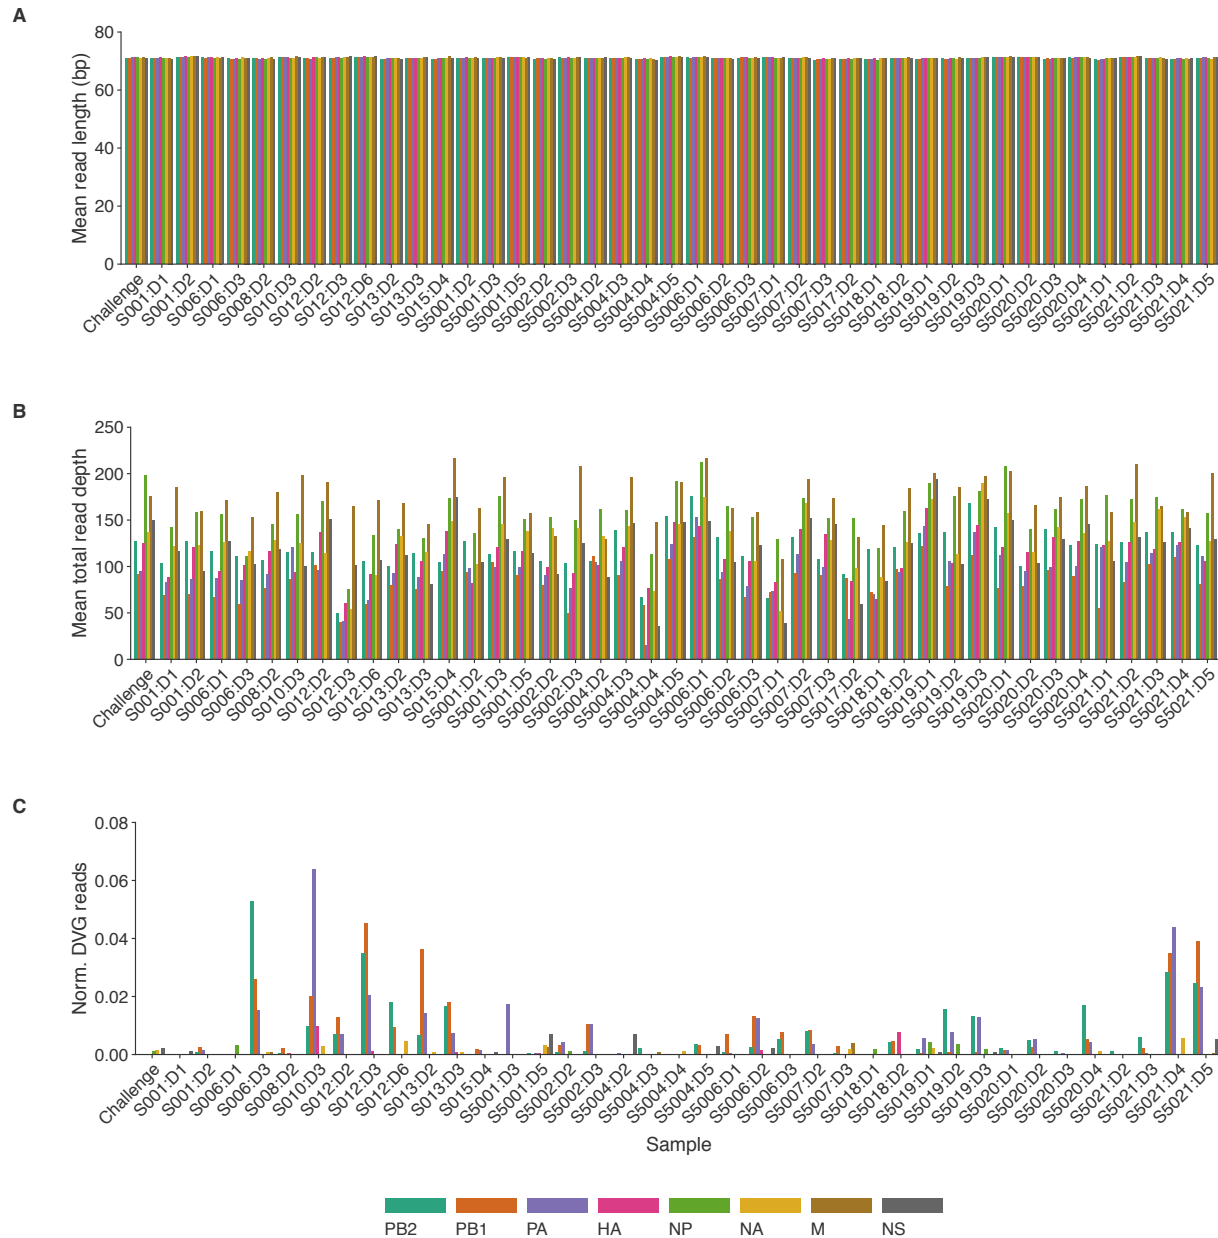

612

613 Figure S2. Summary of sequencing data. Bars are organized first by subject, then by sampling  
614 day, and finally by gene. Genes are also represented by colors. Data are summed across technical  
615 replicates. A) Mean length of mapped reads following read trimming, reference mapping, and  
616 removal of PCR duplicates. B) Mean total read depth following read trimming, reference  
617 mapping, and removal of PCR duplicates. C) Mean depth of split reads following read trimming,  
618 reference mapping, removal of PCR duplicates, and filtering of split reads to exclude those with

- 619 less than 15 alignment matches, less than 5 consecutive alignment matches, more than three  
620 small indels, and with junction locations less than 100 bases apart.

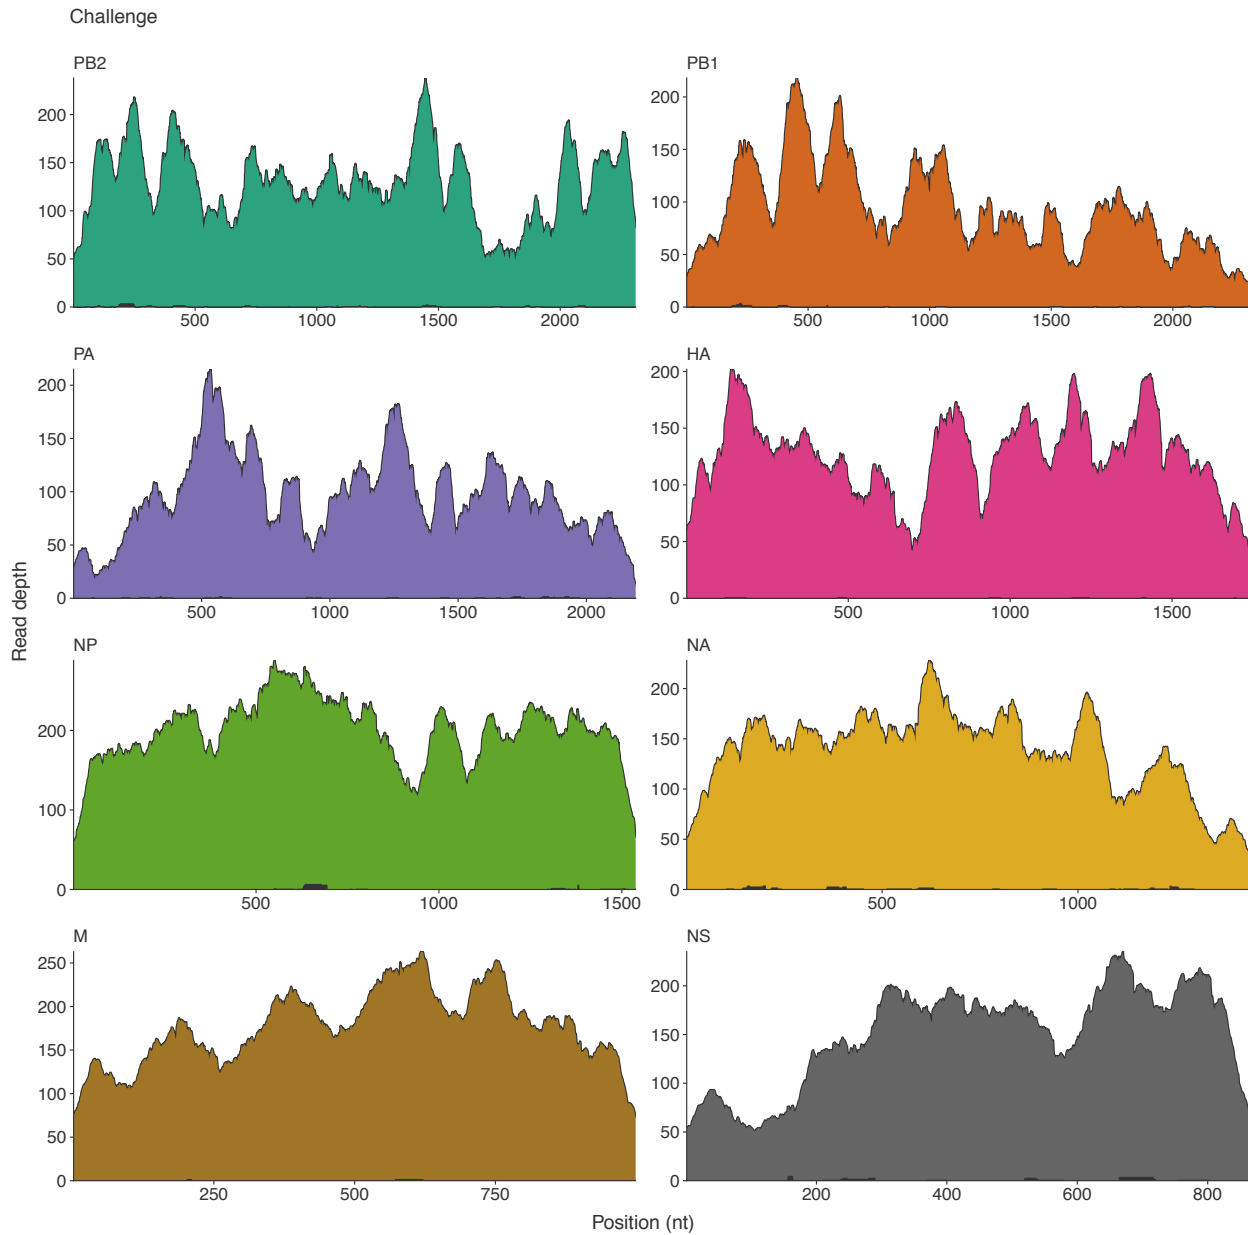

621

622 Figure S3. Coverage plot for each gene segment in the challenge stock used to infect all patients.

623 Colored portions represent total read depth and black overlays represent read depth of split reads.

624 Lack of appreciable split read depth indicates a lack of defective viral genomes (DVGs). The NP,

625 NA, and NS gene segments each harbored a single DVG species, while no DVG species were

626 identified in the other 5 gene segments.

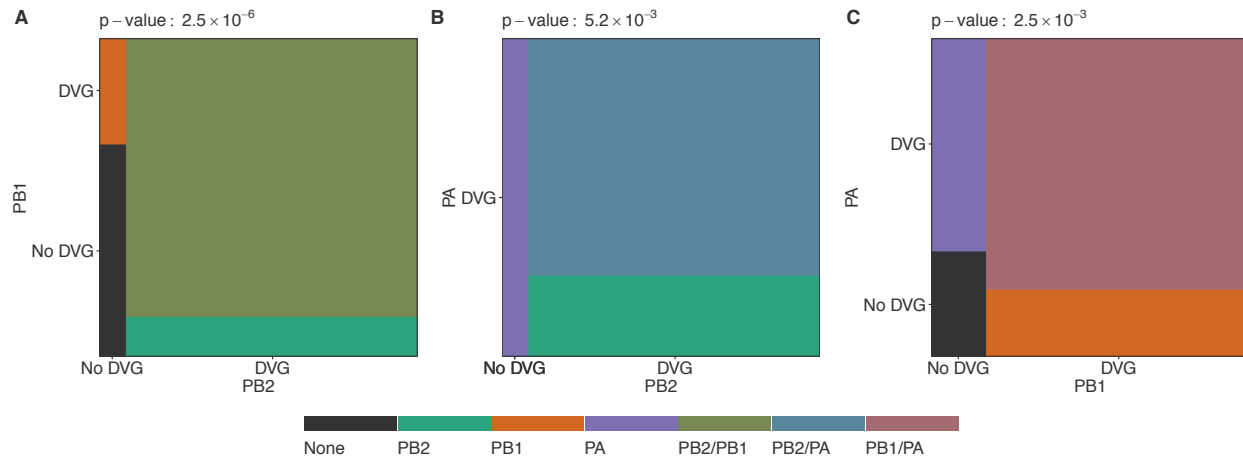

627

628 Figure S4. Mosaic plots representing the per-sample dependence of defective viral genome  
629 (DVG) presence in pairwise combinations of the PB2, PB1, and PA gene segments. Axis  
630 represent the proportion of all samples. Grey area indicates lack of DVGs in either gene segment  
631 and colored areas represent DVG presence in either or both gene segments. Fisher's exact test p-  
632 values are listed above each plot. A) Association between DVG presence in the PB2 and PB1  
633 genes. Green area represents samples with DVGs only in the PB2 gene, orange area represents  
634 samples with DVGs only in the PB1 gene and forest green area represents samples with DVGs in  
635 both genes. B) Association between DVG presence in the PB2 and PA gene segments. Green  
636 area represents samples with DVGs only in the PB2 gene, purple area represents samples with  
637 DVGs only in the PA gene, and blue area represents samples with DVGs in both. C) Association  
638 between DVG presence in the PB1 and PA gene segments. Orange area represents samples with  
639 DVGs only in the PB1 gene, purple area represents samples with DVGs only in the PA gene, and  
640 mauve area represents samples with DVGs in both genes.

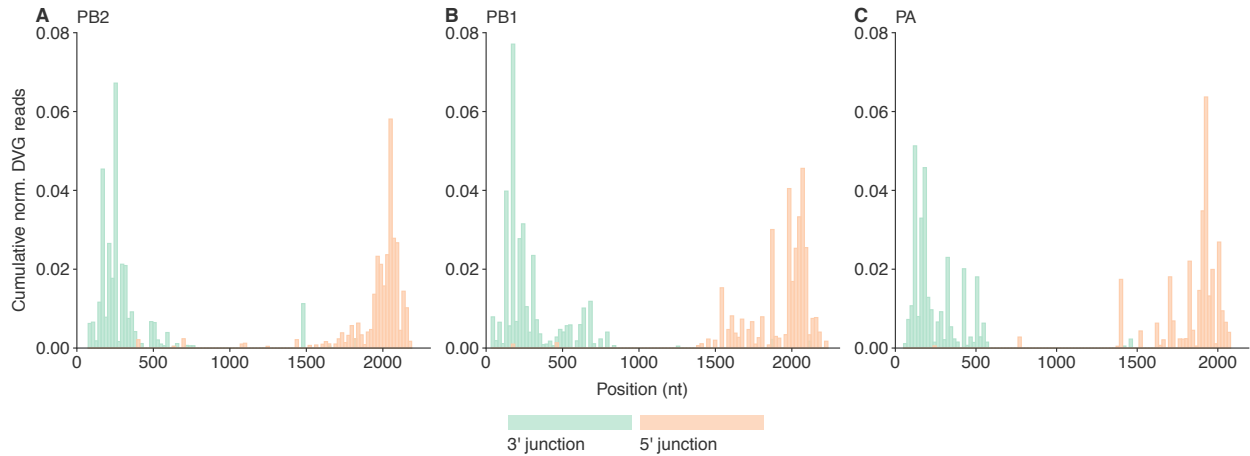

641

642 Figure S5. Histograms (100 bins) showing the cumulative relative read support values for the 3'  
643 (green) and 5' (orange) junction locations (compared to the reference) of the deletions generating  
644 individual DVG species. The relative read support for DVGs observed within individual samples  
645 was first normalized to the total number of reads mapped to that gene segment and then summed  
646 across subjects. Data are shown for DVGs observed in the A) PB2, B) PB1, and C) PA genes.

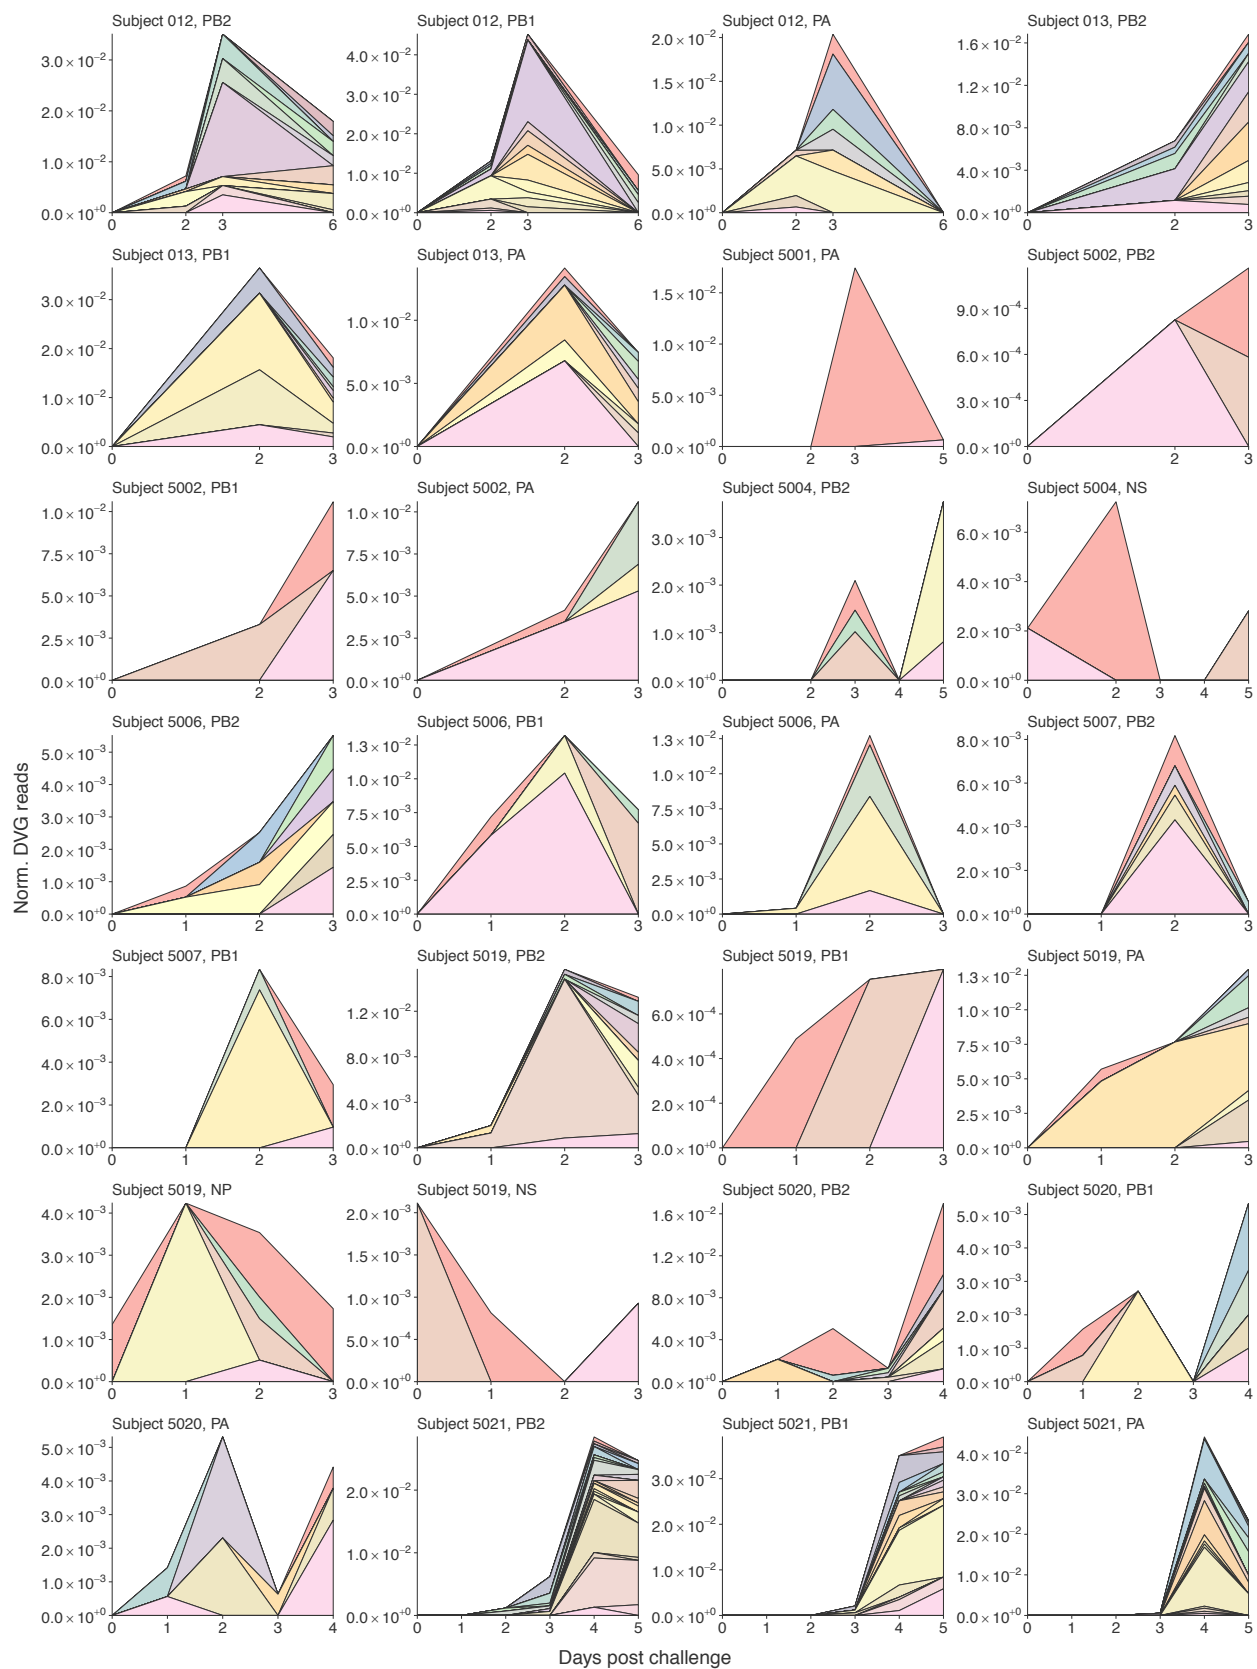

648 Figure S6. Stacked area plots representing the defective viral genome (DVG) species within each  
649 gene for subjects with DVGs observed on multiple days. Each color represents an individual  
650 DVG species. The height of each region represents the normalized number of DVG reads  
651 supporting that DVG. DVG colors are not consistent between subjects.

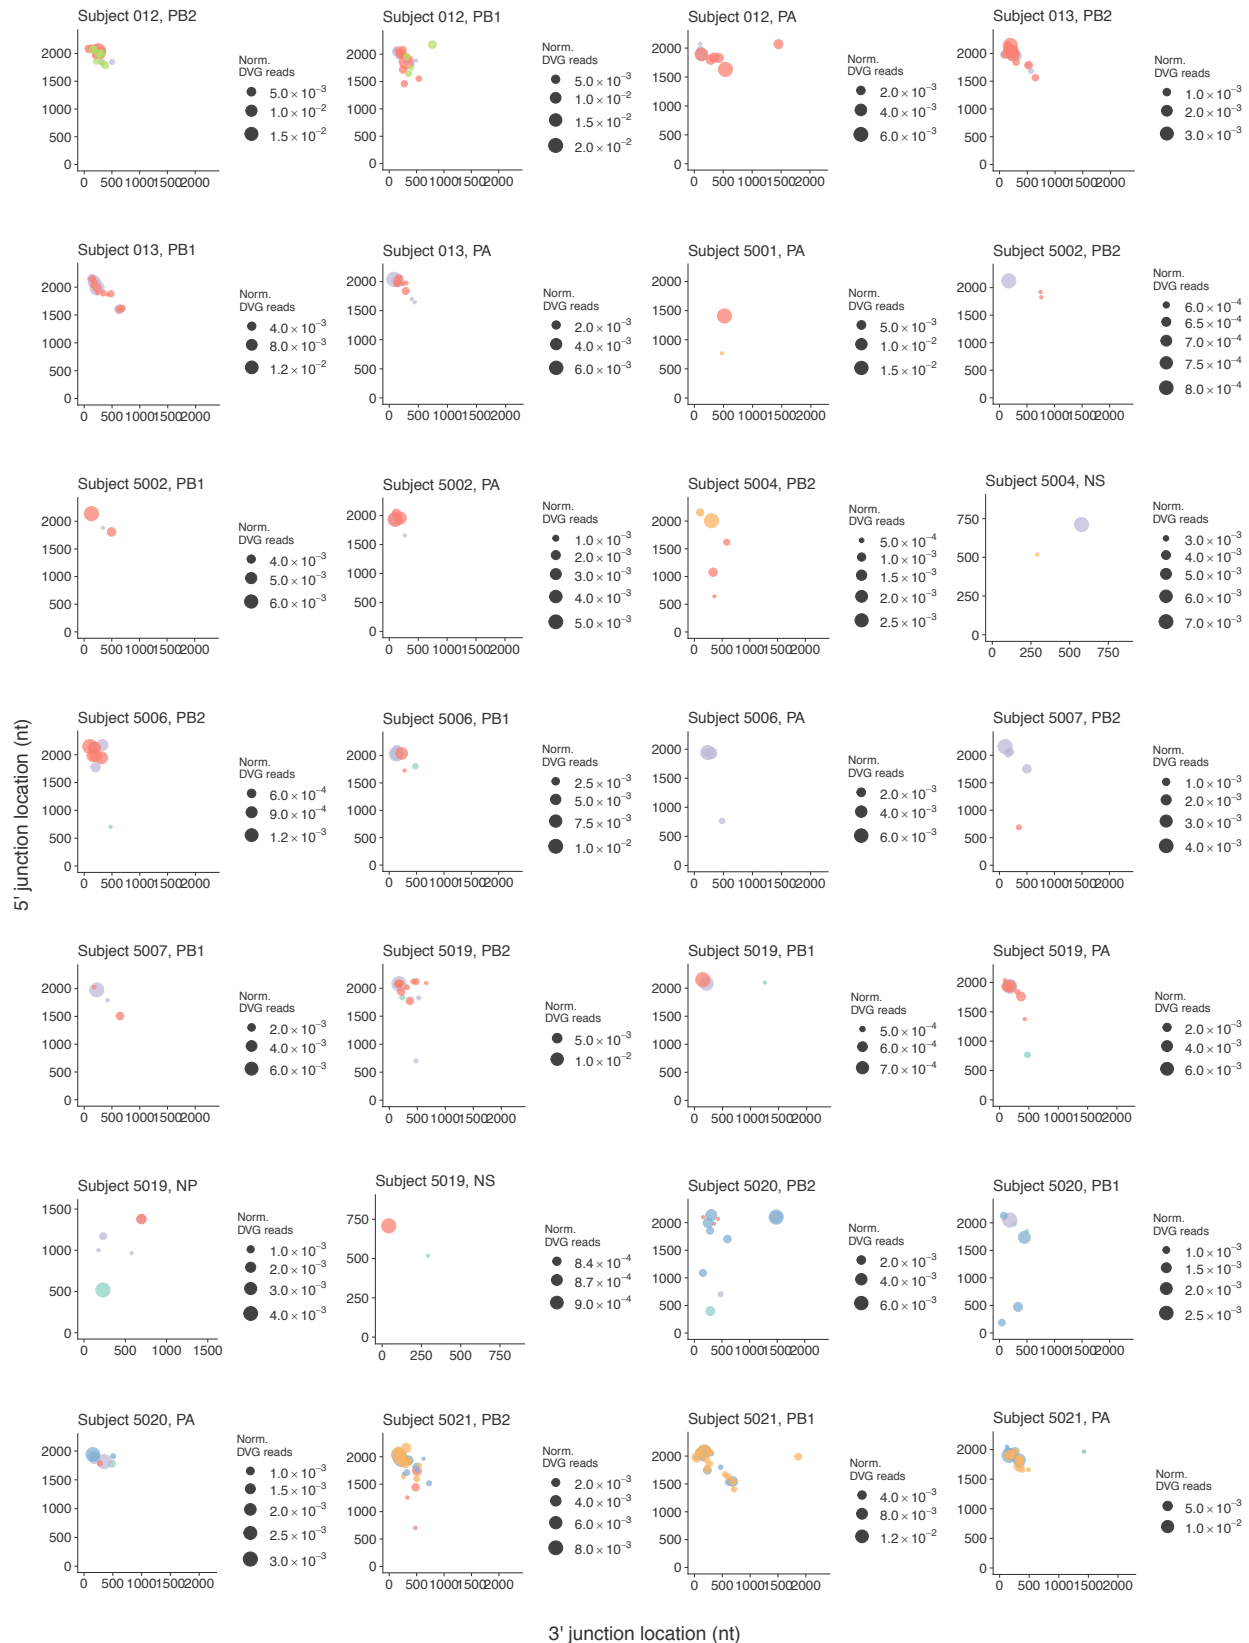



653 Figure S7. Dot plots representing the defective viral genome (DVG) species within each gene for  
654 subjects with DVGs observed on multiple days. The x-axis represents the 3' junction location  
655 and the y-axis represents the 5' junction location. Dot size is dependent on the number of reads  
656 supporting a given DVG species, normalized by the number of reads mapped to that gene  
657 segment. Color represents sampling day.

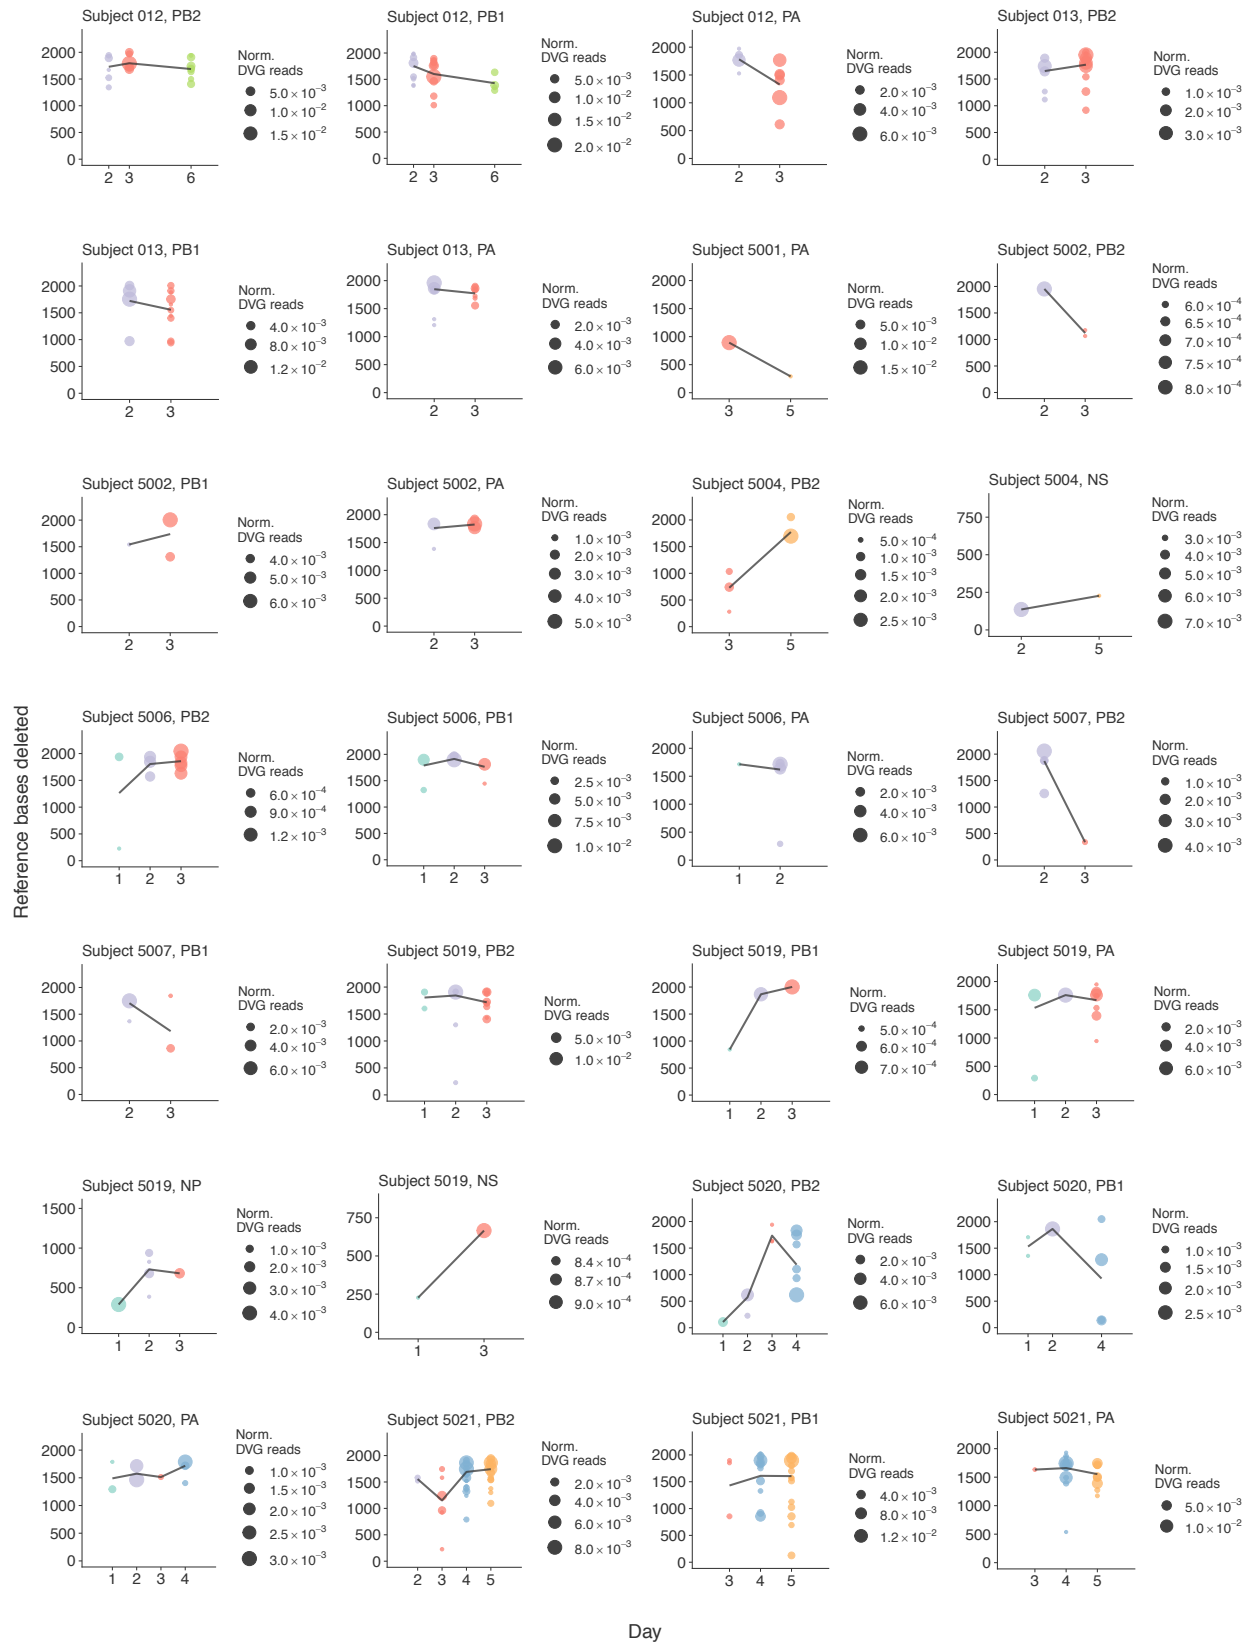

659 Figure S8. Dot plots representing the number of reference bases deleted in the observed defective  
660 viral genomes (DVG) species with each gene for subjects with DVGs observed on multiple days.  
661 Dot size is dependent on the number of reads supporting a given DVG species, normalized by  
662 the number of reads mapped to that gene segment. Color represents sampling day. Trend lines  
663 connect the mean number of reference bases deleted on each given day, weighted by the  
664 normalized number of supporting reads.

**TABLE S1** Viral load and symptom scores

|                                                              | Cohort          |                      |                   | p-value |
|--------------------------------------------------------------|-----------------|----------------------|-------------------|---------|
|                                                              | All (mean [sd]) | Standard (mean [sd]) | Early (mean [sd]) |         |
| Peak viral titer ( $\log_{10}(\text{TCID}_{50}/\text{mL})$ ) | 4.46 [1.15]     | 4.55 [0.84]          | 4.34 [1.48]       | 0.922   |
| Time to peak viral titer (hours)                             | 57.85 [25.75]   | 64.95 [27.01]        | 47.71 [19.82]     | 0.080   |
| Duration of infection (hours)                                | 99.71 [38.57]   | 117.80 [37.23]       | 73.86 [22.32]     | 0.035   |
| Peak SS                                                      | 6.47 [4.75]     | 6.10 [4.25]          | 7.00 [5.35]       | 0.922   |
| Time to peak SS (hours)                                      | 46.65 [22.18]   | 59.30 [17.57]        | 28.57 [14.09]     | 0.003   |
| Duration of symptoms (hours)                                 | 113.06 [36.98]  | 134.20 [17.21]       | 82.86 [36.71]     | 0.005   |
| Cumulative SS                                                | 39.88 [42.94]   | 43.30 [49.99]        | 35.00 [29.43]     | 0.887   |

665  
666 Table S1. Summary statistics for peak viral titer ( $\log_{10}(\text{TCID}_{50}/\text{mL})$ ), time to peak viral titer  
667 (hours), duration of infection, peak Modified Jackson symptom score, time to peak symptom  
668 score (hours), duration of symptoms (hours), and cumulative symptom score. Mean and  
669 population standard deviation are presented for all subjects, those in the early (treatment with  
670 oseltamivir on the evening of the first day post challenge) cohort, and those in the standard  
671 (treatment with oseltamivir on the evening of the fifth day post challenge) cohort. P-values  
672 comparing the early and standard treatment cohorts resultant from Mann-Whitney *U* tests are  
673 shown at right.

**TABLE S2** Clinical data by subject

| Subject | Inoculum (TCID <sub>50</sub> /ml) | Treatment cohort | Peak viral titer (TCID <sub>50</sub> /ml) | Time to peak viral titer (hours) | Duration of infection (hours) | Peak symptom score | Time to peak symptom score (hours) | Cumulative symptom score |
|---------|-----------------------------------|------------------|-------------------------------------------|----------------------------------|-------------------------------|--------------------|------------------------------------|--------------------------|
| 001     | 6.41                              | Standard         | 4.25                                      | 24.0                             | 48.0                          | 9                  | 45.0                               | 40                       |
| 006     | 5.25                              | Standard         | 5.00                                      | 48.0                             | 168.0                         | 7                  | 36.0                               | 55                       |
| 008     | 5.25                              | Standard         | 4.75                                      | 48.0                             | 74.0                          | 10                 | 60.0                               | 60                       |
| 010     | 4.41                              | Standard         | 3.75                                      | 74.0                             | 120.0                         | 5                  | 93.0                               | 22                       |
| 012     | 4.41                              | Standard         | 5.01                                      | 48.0                             | 168.0                         | 4                  | 69.0                               | 18                       |
| 013     | 3.08                              | Standard         | 5.50                                      | 74.0                             | 96.0                          | 2                  | 69.0                               | 12                       |
| 015     | 3.08                              | Standard         | 4.50                                      | 120.0                            | 144.0                         | 2                  | 45.0                               | 9                        |
| 5001    | 5.50                              | Early            | 2.75                                      | 95.0                             | 124.5                         | 2                  | 0.0                                | 11                       |
| 5002    | 5.50                              | Early            | 5.50                                      | 42.0                             | 70.0                          | 14                 | 40.0                               | 63                       |
| 5004    | 5.50                              | Standard         | 2.50                                      | 76.5                             | 118.0                         | 3                  | 56.0                               | 23                       |
| 5006    | 5.50                              | Early            | 6.25                                      | 42.0                             | 76.5                          | 8                  | 40.0                               | 45                       |
| 5007    | 5.50                              | Early            | 4.00                                      | 42.0                             | 70.0                          | 2                  | 32.0                               | 6                        |
| 5017    | 5.50                              | Early            | 1.75                                      | 42.0                             | 53.0                          | 1                  | 16.0                               | 1                        |
| 5018    | 5.50                              | Early            | 5.00                                      | 29.0                             | 53.0                          | 7                  | 40.0                               | 33                       |
| 5019    | 5.50                              | Early            | 5.12                                      | 42.0                             | 70.0                          | 15                 | 32.0                               | 86                       |
| 5020    | 5.50                              | Standard         | 5.00                                      | 42.0                             | 100.5                         | 16                 | 40.0                               | 184                      |
| 5021    | 5.50                              | Standard         | 5.27                                      | 95.0                             | 141.5                         | 3                  | 80.0                               | 10                       |

674

675 Table S2. Clinical data, including inoculum dose ( $\log_{10}(\text{TCID}_{50}/\text{mL})$ ), treatment cohort, peak  
676 viral titer ( $\log_{10}(\text{TCID}_{50}/\text{mL})$ ), time to peak viral titer (hours), duration of infection (hours), peak  
677 Modified Jackson symptom score, time to peak symptom score (hours), and cumulative symptom  
678 score, by subject

**Table S3** Sequencing data

| Subject   | Day | Mean [sd] read length (bp) |              |              |              |              |              |              |              |
|-----------|-----|----------------------------|--------------|--------------|--------------|--------------|--------------|--------------|--------------|
|           |     | PB2                        | PB1          | PA           | HA           | NP           | NA           | M            | NS           |
| Challenge | 0   | 70.86 [0.15]               | 70.90 [0.17] | 71.14 [0.17] | 71.18 [0.16] | 71.10 [0.14] | 70.98 [0.18] | 71.23 [0.18] | 70.99 [0.22] |
|           | 1   | 70.91 [0.17]               | 70.83 [0.21] | 70.82 [0.20] | 71.14 [0.20] | 70.81 [0.18] | 70.99 [0.19] | 71.05 [0.19] | 70.70 [0.27] |
|           | 2   | 71.35 [0.14]               | 71.23 [0.18] | 71.29 [0.17] | 71.65 [0.15] | 71.28 [0.15] | 71.44 [0.17] | 71.58 [0.17] | 71.45 [0.25] |
| 001       | 1   | 71.16 [0.15]               | 70.96 [0.21] | 71.15 [0.18] | 71.17 [0.19] | 70.94 [0.16] | 71.12 [0.18] | 71.09 [0.19] | 71.11 [0.24] |
|           | 3   | 70.75 [0.16]               | 70.50 [0.24] | 70.66 [0.20] | 70.96 [0.19] | 70.60 [0.21] | 71.15 [0.19] | 71.05 [0.20] | 71.01 [0.27] |
| 006       | 2   | 70.78 [0.17]               | 70.83 [0.19] | 70.73 [0.19] | 70.96 [0.18] | 70.47 [0.18] | 70.88 [0.19] | 71.13 [0.18] | 70.45 [0.27] |
|           | 3   | 71.11 [0.15]               | 71.10 [0.17] | 71.32 [0.14] | 71.25 [0.19] | 71.06 [0.16] | 70.90 [0.19] | 71.54 [0.15] | 71.43 [0.24] |
| 008       | 2   | 70.94 [0.16]               | 70.91 [0.17] | 70.66 [0.19] | 71.15 [0.16] | 71.12 [0.15] | 71.06 [0.19] | 71.38 [0.17] | 71.11 [0.21] |
|           | 3   | 70.84 [0.25]               | 71.05 [0.26] | 71.12 [0.26] | 71.27 [0.22] | 70.92 [0.24] | 71.12 [0.28] | 71.21 [0.18] | 71.52 [0.23] |
| 010       | 6   | 71.13 [0.16]               | 71.10 [0.21] | 71.14 [0.20] | 71.51 [0.17] | 71.10 [0.16] | 71.29 [0.21] | 71.41 [0.17] | 71.46 [0.23] |
|           | 2   | 70.62 [0.18]               | 70.54 [0.20] | 70.79 [0.18] | 71.01 [0.17] | 70.81 [0.18] | 70.97 [0.18] | 71.00 [0.19] | 70.65 [0.28] |
| 012       | 3   | 70.78 [0.16]               | 70.80 [0.20] | 70.99 [0.19] | 71.09 [0.18] | 70.97 [0.18] | 70.91 [0.20] | 71.17 [0.20] | 71.32 [0.28] |
|           | 4   | 70.59 [0.18]               | 70.61 [0.18] | 70.81 [0.16] | 71.00 [0.16] | 70.95 [0.15] | 70.82 [0.18] | 71.46 [0.15] | 70.99 [0.21] |
| 013       | 2   | 70.95 [0.15]               | 70.96 [0.17] | 70.94 [0.17] | 71.13 [0.20] | 70.86 [0.18] | 70.88 [0.22] | 71.19 [0.18] | 71.00 [0.27] |
|           | 3   | 70.80 [0.16]               | 70.78 [0.17] | 70.98 [0.17] | 70.98 [0.18] | 70.98 [0.16] | 71.15 [0.17] | 71.21 [0.17] | 70.92 [0.24] |
| 5001      | 5   | 71.10 [0.15]               | 71.13 [0.17] | 71.33 [0.16] | 71.24 [0.17] | 71.17 [0.16] | 71.37 [0.16] | 70.90 [0.21] | 71.13 [0.25] |
|           | 2   | 70.70 [0.17]               | 70.93 [0.19] | 70.98 [0.18] | 70.93 [0.20] | 70.72 [0.17] | 71.05 [0.17] | 70.97 [0.22] | 70.69 [0.31] |
| 5002      | 3   | 71.12 [0.16]               | 70.82 [0.24] | 70.97 [0.19] | 71.21 [0.18] | 70.81 [0.17] | 70.97 [0.18] | 71.22 [0.16] | 71.16 [0.23] |
|           | 2   | 70.77 [0.17]               | 70.96 [0.16] | 70.90 [0.17] | 70.97 [0.19] | 70.84 [0.16] | 70.84 [0.19] | 70.98 [0.22] | 71.10 [0.28] |
| 5004      | 3   | 70.79 [0.15]               | 70.77 [0.19] | 70.92 [0.17] | 71.02 [0.17] | 70.94 [0.17] | 71.10 [0.18] | 71.30 [0.17] | 70.80 [0.24] |
|           | 4   | 70.69 [0.22]               | 70.42 [0.24] | 70.58 [0.47] | 70.83 [0.23] | 70.69 [0.20] | 70.94 [0.25] | 70.56 [0.22] | 70.39 [0.50] |
| 5006      | 5   | 71.36 [0.12]               | 71.35 [0.14] | 71.36 [0.14] | 71.61 [0.13] | 71.38 [0.13] | 71.34 [0.16] | 71.49 [0.16] | 71.38 [0.20] |
|           | 1   | 71.21 [0.12]               | 71.02 [0.14] | 71.21 [0.13] | 71.31 [0.15] | 71.23 [0.13] | 71.17 [0.15] | 71.50 [0.15] | 71.30 [0.20] |
| 5007      | 2   | 70.88 [0.15]               | 70.80 [0.19] | 70.76 [0.18] | 71.07 [0.18] | 70.82 [0.16] | 71.02 [0.17] | 70.80 [0.20] | 70.53 [0.29] |
|           | 3   | 70.88 [0.17]               | 71.24 [0.20] | 71.13 [0.20] | 71.18 [0.19] | 71.00 [0.17] | 71.06 [0.21] | 71.41 [0.19] | 71.00 [0.26] |
| 5017      | 1   | 71.14 [0.20]               | 71.17 [0.19] | 71.18 [0.19] | 71.20 [0.20] | 71.00 [0.17] | 70.96 [0.30] | 71.00 [0.24] | 71.27 [0.39] |
|           | 2   | 70.96 [0.14]               | 70.79 [0.18] | 70.84 [0.16] | 71.03 [0.16] | 70.85 [0.16] | 71.20 [0.15] | 71.35 [0.17] | 71.00 [0.21] |
| 5018      | 3   | 70.39 [0.18]               | 70.48 [0.19] | 70.46 [0.19] | 70.82 [0.17] | 70.65 [0.18] | 70.54 [0.20] | 70.99 [0.19] | 70.77 [0.23] |
|           | 2   | 70.73 [0.18]               | 70.60 [0.19] | 70.52 [0.29] | 70.83 [0.22] | 70.63 [0.18] | 70.87 [0.23] | 70.99 [0.22] | 70.90 [0.35] |
| 5019      | 1   | 70.71 [0.16]               | 70.65 [0.21] | 70.74 [0.21] | 70.97 [0.24] | 70.37 [0.21] | 70.86 [0.23] | 70.94 [0.21] | 70.87 [0.31] |
|           | 2   | 70.97 [0.15]               | 70.87 [0.17] | 71.02 [0.17] | 71.03 [0.19] | 70.96 [0.16] | 70.98 [0.19] | 71.31 [0.17] | 71.03 [0.24] |
| 5020      | 1   | 70.70 [0.15]               | 70.44 [0.17] | 70.82 [0.15] | 70.98 [0.15] | 70.85 [0.15] | 70.94 [0.16] | 70.97 [0.18] | 71.06 [0.19] |
|           | 2   | 70.78 [0.15]               | 70.65 [0.20] | 70.67 [0.18] | 70.84 [0.19] | 70.75 [0.17] | 70.67 [0.21] | 71.13 [0.18] | 70.90 [0.28] |
| 5021      | 3   | 71.06 [0.12]               | 70.75 [0.16] | 71.04 [0.14] | 71.09 [0.15] | 71.00 [0.15] | 71.22 [0.14] | 71.42 [0.16] | 71.12 [0.20] |
|           | 1   | 71.35 [0.13]               | 71.31 [0.18] | 71.17 [0.16] | 71.41 [0.16] | 71.28 [0.13] | 71.17 [0.16] | 71.45 [0.16] | 71.22 [0.22] |
| 5022      | 2   | 71.14 [0.16]               | 71.24 [0.18] | 71.32 [0.16] | 71.13 [0.17] | 71.11 [0.17] | 71.29 [0.19] | 71.27 [0.18] | 71.39 [0.25] |
|           | 3   | 70.71 [0.15]               | 70.77 [0.18] | 70.72 [0.18] | 70.98 [0.17] | 70.88 [0.16] | 70.98 [0.18] | 70.94 [0.19] | 70.96 [0.24] |
| 5023      | 4   | 71.14 [0.14]               | 70.82 [0.18] | 71.12 [0.16] | 71.23 [0.16] | 71.12 [0.15] | 71.10 [0.18] | 71.17 [0.17] | 71.05 [0.22] |
|           | 1   | 70.48 [0.17]               | 70.16 [0.26] | 70.62 [0.17] | 70.72 [0.19] | 70.81 [0.15] | 70.80 [0.19] | 70.92 [0.21] | 71.06 [0.25] |
| 5024      | 2   | 71.21 [0.14]               | 71.36 [0.16] | 71.25 [0.15] | 71.42 [0.15] | 71.41 [0.14] | 71.32 [0.16] | 71.62 [0.15] | 71.55 [0.20] |
|           | 3   | 71.00 [0.14]               | 70.83 [0.17] | 71.03 [0.16] | 71.02 [0.18] | 71.02 [0.15] | 71.12 [0.16] | 71.00 [0.20] | 70.73 [0.26] |
| 5025      | 4   | 70.62 [0.15]               | 70.43 [0.17] | 70.82 [0.16] | 70.79 [0.18] | 70.62 [0.17] | 70.83 [0.18] | 70.66 [0.21] | 70.81 [0.23] |
|           | 5   | 71.01 [0.15]               | 70.92 [0.19] | 71.19 [0.15] | 71.38 [0.17] | 70.98 [0.16] | 70.74 [0.20] | 71.32 [0.17] | 71.11 [0.23] |

**Table S3 (cont.)** Sequencing data

| Subject   | Day | Genome         | PB2            | PB1            | PA             | Mean [sd] read depth |                |                |                |                |
|-----------|-----|----------------|----------------|----------------|----------------|----------------------|----------------|----------------|----------------|----------------|
|           |     |                |                |                |                | HA                   | NP             | NA             | M              | NS             |
| Challenge | 0   | 130.06 [52.95] | 127.70 [38.73] | 91.83 [42.16]  | 95.24 [39.26]  | 125.10 [34.74]       | 198.38 [40.59] | 137.17 [39.55] | 176.27 [41.50] | 150.11 [49.92] |
|           | 1   | 105.56 [41.69] | 103.17 [25.92] | 68.62 [21.91]  | 83.20 [25.05]  | 88.15 [26.48]        | 142.68 [30.72] | 122.12 [27.07] | 185.26 [32.26] | 116.76 [28.61] |
|           | 2   | 113.22 [41.24] | 127.14 [29.16] | 69.79 [18.45]  | 86.60 [25.43]  | 120.38 [34.46]       | 158.72 [30.33] | 123.17 [27.81] | 159.25 [34.73] | 94.52 [26.69]  |
| 001       | 1   | 110.78 [42.77] | 116.57 [26.32] | 66.61 [24.71]  | 87.77 [28.21]  | 94.82 [30.87]        | 156.83 [26.89] | 125.91 [23.33] | 171.00 [36.92] | 127.25 [37.10] |
|           | 3   | 99.82 [40.89]  | 110.84 [57.47] | 59.49 [15.91]  | 85.41 [23.48]  | 100.90 [26.52]       | 111.04 [23.14] | 116.61 [22.68] | 153.25 [39.28] | 102.94 [28.13] |
| 006       | 2   | 113.41 [40.34] | 106.35 [24.87] | 76.83 [25.04]  | 92.26 [26.07]  | 115.97 [24.47]       | 145.97 [28.23] | 128.02 [30.74] | 180.31 [34.93] | 119.10 [47.41] |
| 008       | 3   | 119.43 [43.94] | 115.34 [32.97] | 86.64 [22.62]  | 120.70 [35.37] | 93.73 [24.75]        | 156.55 [37.43] | 124.88 [34.71] | 198.01 [38.01] | 100.53 [28.63] |
| 010       | 2   | 126.84 [43.61] | 115.09 [32.53] | 101.59 [29.02] | 96.15 [26.89]  | 137.44 [39.56]       | 170.32 [36.08] | 114.69 [17.74] | 190.56 [34.17] | 151.51 [40.19] |
| 012       | 3   | 63.32 [43.06]  | 49.91 [39.48]  | 40.00 [23.27]  | 40.92 [14.73]  | 60.78 [26.14]        | 75.17 [19.73]  | 53.68 [13.11]  | 165.06 [40.19] | 100.89 [36.52] |
|           | 6   | 95.41 [44.16]  | 105.38 [39.59] | 59.09 [21.16]  | 63.29 [22.32]  | 91.49 [36.44]        | 133.23 [23.12] | 90.93 [27.26]  | 171.92 [34.36] | 107.00 [37.60] |
| 013       | 2   | 112.48 [38.53] | 100.57 [21.73] | 79.72 [33.78]  | 92.37 [27.64]  | 124.28 [32.24]       | 140.01 [22.83] | 133.02 [21.51] | 168.21 [38.61] | 111.76 [32.21] |
|           | 3   | 104.34 [34.72] | 114.63 [40.05] | 75.03 [18.78]  | 88.39 [24.34]  | 105.32 [26.22]       | 130.78 [17.15] | 115.17 [25.38] | 145.23 [33.25] | 81.35 [23.64]  |
| 015       | 4   | 134.29 [47.29] | 104.83 [28.54] | 95.00 [25.56]  | 113.62 [27.78] | 138.17 [40.59]       | 173.60 [24.57] | 148.29 [23.56] | 216.44 [32.05] | 174.65 [46.81] |
| 5001      | 2   | 110.54 [36.89] | 127.36 [33.58] | 93.87 [23.77]  | 98.40 [31.09]  | 82.29 [31.53]        | 136.26 [24.58] | 102.39 [29.27] | 162.95 [27.35] | 104.86 [27.77] |
|           | 3   | 128.28 [40.79] | 113.66 [24.05] | 104.42 [25.65] | 99.62 [25.44]  | 120.32 [27.06]       | 175.76 [33.23] | 145.06 [24.48] | 195.75 [33.56] | 129.46 [32.22] |
| 5002      | 5   | 118.42 [36.63] | 117.02 [27.56] | 90.22 [27.35]  | 98.79 [28.67]  | 117.00 [32.22]       | 151.29 [24.31] | 137.83 [22.35] | 157.81 [31.82] | 113.92 [45.35] |
|           | 2   | 108.42 [37.70] | 105.78 [30.46] | 80.25 [22.42]  | 90.56 [29.29]  | 99.65 [26.66]        | 153.16 [28.78] | 140.74 [36.07] | 132.97 [27.18] | 91.97 [26.91]  |
| 5004      | 3   | 107.12 [52.31] | 103.33 [35.41] | 50.00 [22.62]  | 76.93 [26.53]  | 93.27 [29.64]        | 150.14 [31.62] | 141.28 [30.65] | 207.92 [26.98] | 124.62 [34.43] |
|           | 2   | 115.79 [37.03] | 105.43 [27.83] | 110.79 [33.77] | 104.62 [31.04] | 101.59 [26.24]       | 161.45 [29.79] | 133.09 [24.60] | 129.19 [40.40] | 88.16 [39.56]  |
| 5006      | 3   | 130.44 [39.07] | 138.70 [27.24] | 90.92 [18.15]  | 105.39 [23.20] | 120.72 [32.72]       | 160.42 [22.74] | 143.18 [21.67] | 196.52 [31.48] | 146.21 [33.37] |
|           | 4   | 68.14 [42.28]  | 66.86 [30.54]  | 58.40 [18.18]  | 14.78 [ 9.39]  | 76.24 [24.65]        | 113.55 [29.63] | 73.08 [18.56]  | 147.74 [26.75] | 35.58 [14.47]  |
|           | 5   | 146.08 [42.29] | 154.27 [27.75] | 108.22 [26.89] | 123.64 [35.86] | 147.62 [43.76]       | 191.72 [32.06] | 145.11 [24.71] | 190.59 [26.93] | 148.25 [40.29] |
| 5007      | 1   | 165.53 [43.03] | 175.88 [29.02] | 131.60 [25.84] | 152.71 [35.73] | 143.46 [36.89]       | 212.54 [33.32] | 174.14 [31.23] | 216.26 [31.28] | 148.85 [43.29] |
|           | 2   | 119.50 [41.96] | 131.30 [31.50] | 86.17 [20.91]  | 93.71 [41.21]  | 108.39 [33.88]       | 164.76 [25.35] | 137.73 [30.07] | 162.43 [34.95] | 104.45 [30.76] |
| 5017      | 3   | 105.76 [39.33] | 110.57 [28.05] | 66.47 [21.51]  | 78.56 [21.71]  | 105.35 [29.63]       | 153.19 [31.31] | 105.67 [17.87] | 158.32 [23.16] | 122.84 [34.83] |
|           | 1   | 77.68 [34.32]  | 66.21 [22.47]  | 72.25 [22.22]  | 72.98 [26.40]  | 83.51 [29.53]        | 129.63 [31.82] | 51.46 [13.22]  | 107.91 [23.70] | 39.23 [16.92]  |
| 5018      | 2   | 137.64 [47.75] | 131.16 [36.17] | 92.55 [33.66]  | 112.74 [29.08] | 140.41 [46.79]       | 174.09 [25.26] | 168.71 [36.77] | 193.59 [37.90] | 151.99 [47.76] |
|           | 3   | 121.60 [37.73] | 107.81 [22.88] | 90.21 [29.32]  | 99.59 [25.60]  | 135.14 [30.84]       | 151.99 [22.48] | 128.28 [24.47] | 173.69 [32.53] | 145.66 [38.65] |
| 5019      | 2   | 90.64 [44.18]  | 92.17 [34.62]  | 87.88 [35.07]  | 42.94 [27.10]  | 83.79 [28.90]        | 152.08 [30.09] | 98.05 [24.10]  | 131.47 [35.36] | 59.75 [24.48]  |
|           | 1   | 92.19 [35.56]  | 118.53 [27.01] | 72.54 [17.66]  | 69.80 [23.76]  | 64.42 [22.19]        | 119.32 [26.95] | 88.38 [23.81]  | 144.81 [29.91] | 84.16 [28.46]  |
| 5020      | 2   | 119.67 [41.05] | 121.00 [36.26] | 97.33 [29.51]  | 94.29 [26.36]  | 98.65 [31.48]        | 159.58 [29.00] | 126.20 [24.09] | 184.60 [31.24] | 125.66 [35.19] |
|           | 1   | 156.68 [44.40] | 135.82 [38.49] | 121.54 [30.87] | 143.33 [32.70] | 162.31 [42.45]       | 189.70 [30.71] | 172.60 [23.12] | 200.09 [39.61] | 193.60 [49.27] |
| 5021      | 2   | 120.85 [45.35] | 137.00 [35.58] | 79.06 [22.11]  | 105.55 [29.20] | 103.99 [34.07]       | 175.37 [35.49] | 113.37 [23.06] | 185.75 [31.28] | 102.50 [35.94] |
|           | 3   | 156.41 [44.08] | 167.84 [38.59] | 111.86 [21.39] | 136.82 [36.14] | 144.16 [37.54]       | 181.09 [26.27] | 189.70 [28.79] | 197.68 [39.11] | 172.45 [47.86] |
| 5022      | 1   | 137.26 [52.20] | 141.90 [38.88] | 76.92 [18.67]  | 111.84 [33.70] | 120.94 [38.13]       | 207.55 [29.35] | 157.01 [25.94] | 202.69 [29.29] | 150.07 [35.68] |
|           | 2   | 109.16 [36.03] | 100.37 [26.59] | 78.86 [20.88]  | 95.27 [26.23]  | 115.49 [31.89]       | 140.46 [27.21] | 115.58 [26.20] | 166.18 [28.39] | 103.89 [32.33] |
| 5023      | 3   | 129.17 [41.06] | 140.08 [34.40] | 95.70 [23.80]  | 99.50 [34.00]  | 131.35 [38.03]       | 161.50 [26.56] | 141.93 [24.15] | 174.47 [44.14] | 129.35 [32.58] |
|           | 4   | 127.35 [42.12] | 123.43 [29.88] | 89.79 [27.19]  | 99.87 [25.11]  | 127.09 [33.38]       | 172.44 [27.99] | 135.91 [23.15] | 186.18 [26.46] | 146.02 [48.68] |
| 5024      | 1   | 119.23 [48.62] | 124.16 [40.50] | 54.82 [22.68]  | 120.59 [30.38] | 122.58 [38.86]       | 176.88 [33.80] | 127.77 [27.01] | 158.76 [29.81] | 105.67 [44.61] |
|           | 2   | 129.49 [43.63] | 126.45 [21.87] | 82.78 [16.16]  | 104.53 [27.36] | 126.65 [29.59]       | 172.31 [26.37] | 147.77 [26.82] | 210.60 [33.68] | 131.21 [34.92] |
| 5025      | 3   | 133.33 [39.74] | 136.60 [33.58] | 102.49 [22.82] | 114.86 [32.83] | 118.42 [30.18]       | 174.26 [32.23] | 162.01 [28.46] | 165.12 [37.60] | 126.60 [34.94] |
|           | 4   | 135.21 [45.59] | 136.99 [46.39] | 110.48 [38.74] | 122.80 [60.09] | 126.64 [30.28]       | 161.63 [27.12] | 153.02 [26.25] | 158.88 [42.28] | 141.37 [47.72] |
| 5026      | 5   | 122.18 [45.43] | 123.22 [39.92] | 81.08 [33.16]  | 111.55 [36.85] | 105.47 [28.74]       | 157.43 [24.94] | 126.80 [25.93] | 200.10 [31.82] | 129.41 [39.81] |

680

681 Table S3. Sequencing data, including mean [population standard deviation (sd)] read length (bp)  
 682 and mean [sd] coverage (reads), for all samples. Data are calculated following read trimming  
 683 (removal of Illumina adapters, leading or trailing bases with quality <3, portions of reads where  
 684 the average quality per-base in 4-base wide sliding windows was <15 and reads with <50 bases)

685 (46), alignment to the reference genome, realignment to a consensus sequence (47), and removal  
686 of PCR duplicates (49). Technical sequencing replicates were processed separately and summary  
687 statistics calculated from the combination of the two samples.



**TABLE S4** DVG read support

| Subject   | Day | Normalized DVG reads |        |        |        |        |        |        |        |
|-----------|-----|----------------------|--------|--------|--------|--------|--------|--------|--------|
|           |     | PB2                  | PB1    | PA     | HA     | NP     | NA     | M      | NS     |
| Challenge | 0   |                      |        |        |        | 0.0014 | 0.0014 |        | 0.0021 |
| 1001      | 1   |                      |        |        |        |        |        |        | 0.0013 |
|           | 2   | 0.0007               | 0.0026 | 0.0015 |        |        |        |        |        |
| 1006      | 1   |                      |        |        |        | 0.0031 |        |        |        |
|           | 3   | 0.0529               | 0.0259 | 0.0154 |        |        | 0.0008 | 0.0009 |        |
| 1008      | 2   | 0.0006               | 0.0023 |        | 0.0007 |        |        |        |        |
| 1010      | 3   | 0.0099               | 0.0200 | 0.0641 | 0.0098 |        | 0.0030 |        |        |
| 1012      | 2   | 0.0072               | 0.0131 | 0.0071 |        |        |        |        |        |
|           | 3   | 0.0351               | 0.0452 | 0.0204 | 0.0013 |        |        |        |        |
|           | 6   | 0.0179               | 0.0096 |        |        |        | 0.0047 |        |        |
| 1013      | 2   | 0.0068               | 0.0365 | 0.0141 |        |        | 0.0007 |        |        |
|           | 3   | 0.0168               | 0.0181 | 0.0074 | 0.0008 |        | 0.0008 |        |        |
| 1015      | 4   |                      | 0.0019 | 0.0016 |        |        |        |        | 0.0009 |
| 5001      | 3   |                      |        | 0.0174 |        |        |        |        |        |
|           | 5   | 0.0005               |        | 0.0006 | 0.0007 |        | 0.0031 | 0.0026 | 0.0069 |
| 5002      | 2   | 0.0008               | 0.0033 | 0.0042 |        | 0.0011 |        |        |        |
|           | 3   | 0.0012               | 0.0106 | 0.0106 |        |        |        |        |        |
| 5004      | 2   |                      |        | 0.0006 |        |        |        |        | 0.0072 |
|           | 3   | 0.0021               |        |        |        |        |        | 0.0007 |        |
|           | 4   |                      |        |        |        |        | 0.0013 |        |        |
|           | 5   | 0.0038               | 0.0034 |        |        |        |        |        | 0.0028 |
|           | 1   | 0.0009               | 0.0072 | 0.0004 |        |        |        |        |        |
| 5006      | 2   | 0.0025               | 0.0132 | 0.0127 | 0.0015 |        |        |        | 0.0023 |
|           | 3   | 0.0055               | 0.0077 |        |        |        |        |        |        |
|           | 2   | 0.0082               | 0.0083 | 0.0036 |        |        |        |        |        |
| 5007      | 3   | 0.0006               | 0.0029 |        |        |        | 0.0018 | 0.0039 |        |
|           | 1   |                      |        |        |        | 0.0018 |        |        |        |
| 5018      | 2   | 0.0044               | 0.0045 |        | 0.0076 |        |        |        |        |
|           | 1   | 0.0020               | 0.0005 | 0.0057 |        | 0.0042 | 0.0023 |        | 0.0008 |
| 5019      | 2   | 0.0157               | 0.0008 | 0.0077 |        | 0.0035 |        |        |        |
|           | 3   | 0.0132               | 0.0008 | 0.0129 |        | 0.0017 |        |        | 0.0009 |
|           | 1   | 0.0021               | 0.0016 | 0.0014 |        |        |        |        |        |
| 5020      | 2   | 0.0051               | 0.0027 | 0.0053 |        |        |        |        |        |
|           | 3   | 0.0013               |        | 0.0006 |        |        |        |        |        |
|           | 4   | 0.0170               | 0.0053 | 0.0044 |        |        | 0.0010 |        |        |
|           | 2   | 0.0012               |        |        |        |        |        |        |        |
| 5021      | 3   | 0.0062               | 0.0021 | 0.0006 |        |        |        |        |        |
|           | 4   | 0.0285               | 0.0351 | 0.0440 |        |        | 0.0057 |        |        |
|           | 5   | 0.0247               | 0.0392 | 0.0233 |        |        |        | 0.0007 | 0.0055 |
|           |     |                      |        |        |        |        |        |        |        |

688

689 Table S4. Normalized DVG read count for all subjects for each gene segment. Values represent

690 the proportion of the reads mapped to a given gene which support DVG species present in both

- 691 technical replicates. Blank cells represent instances where no DVG reads were observed.
- 692 Subjects highlighted in grey represent those in the early treatment (oseltamivir on the first day
- 693 post challenge) treatment cohort.

**TABLE S5** DVG junction sites

|     | Reference length (nt) | 3' junction site |              |              | 5' junction site |              |              | Mean [sd] bases deleted (nt) |
|-----|-----------------------|------------------|--------------|--------------|------------------|--------------|--------------|------------------------------|
|     |                       | Mean [sd] (nt)   | Minimum (nt) | Maximum (nt) | Mean [sd] (nt)   | Minimum (nt) | Maximum (nt) |                              |
| PB2 | 2310                  | 325 [295]        | 84           | 1814         | 1971 [236]       | 398          | 2177         | 1646 [392]                   |
| PB1 | 2312                  | 304 [259]        | 43           | 2113         | 1929 [225]       | 187          | 2224         | 1625 [397]                   |
| PA  | 2192                  | 256 [180]        | 66           | 1455         | 1849 [204]       | 243          | 2074         | 1593 [332]                   |

694

695 Table S5. Summary statistics (mean [population standard deviation (sd)], weighted by the  
696 normalized DVG read count) for the 3' and 5' junction sites (relative to the reference) of DVGs  
697 observed in the PB2, PB1, and PA genes as well as the mean [sd] number of reference bases  
698 deleted.

**TABLE S6** DVG species observed in multiple samples

| Gene | DVG ID    | Samples     |             |             |                  |
|------|-----------|-------------|-------------|-------------|------------------|
| PB2  | 93_1983   | 013, Day 2  | 013, Day 3  |             |                  |
| PB2  | 154_2069  | 5019, Day 2 | 5019, Day 3 |             |                  |
| PB2  | 170_2035  | 5021, Day 4 | 5021, Day 5 |             |                  |
| PB2  | 171_2087  | 010, Day 3  | 5007, Day 2 |             |                  |
| PB2  | 172_2079  | 5019, Day 1 | 5019, Day 2 | 5019, Day 3 |                  |
| PB2  | 187_2125  | 5006, Day 1 | 5006, Day 2 | 5006, Day 3 |                  |
| PB2  | 209_1983  | 010, Day 3  | 5006, Day 3 |             |                  |
| PB2  | 211_1956  | 5021, Day 3 | 5021, Day 4 | 5021, Day 5 |                  |
| PB2  | 241_1982  | 013, Day 2  | 013, Day 3  |             |                  |
| PB2  | 249_2005  | 5021, Day 4 | 5021, Day 5 |             |                  |
| PB2  | 356_1937  | 5021, Day 2 | 5021, Day 3 | 5021, Day 4 | 5021, Day 5      |
| PB2  | 386_1903  | 5021, Day 2 | 5021, Day 4 |             |                  |
| PB2  | 476_703   | 5006, Day 1 | 5019, Day 2 | 5020, Day 2 | 5021, Day 3      |
| PB2  | 505_1743  | 5021, Day 3 | 5021, Day 4 |             |                  |
| PB2  | 523_1789  | 013, Day 2  | 013, Day 3  |             |                  |
| PB2  | 1482_2101 | 5020, Day 2 | 5020, Day 4 |             |                  |
| PB1  | 43_1978   | 5021, Day 4 | 5021, Day 5 |             |                  |
| PB1  | 90_2073   | 5021, Day 4 | 5021, Day 5 |             |                  |
| PB1  | 131_2028  | 5006, Day 1 | 5006, Day 2 |             |                  |
| PB1  | 142_2150  | 013, Day 2  | 013, Day 3  |             |                  |
| PB1  | 179_2076  | 5021, Day 3 | 5021, Day 4 | 5021, Day 5 |                  |
| PB1  | 183_1994  | 012, Day 2  | 012, Day 3  |             |                  |
| PB1  | 183_2092  | 013, Day 2  | 013, Day 3  |             |                  |
| PB1  | 226_1924  | 010, Day 3  | 5021, Day 5 |             |                  |
| PB1  | 231_1746  | 5021, Day 4 | 5021, Day 5 |             |                  |
| PB1  | 232_1986  | 013, Day 2  | 013, Day 3  |             |                  |
| PB1  | 313_1863  | 012, Day 2  | 012, Day 3  |             |                  |
| PB1  | 631_1603  | 013, Day 2  | 013, Day 3  |             |                  |
| PB1  | 689_1544  | 5021, Day 3 | 5021, Day 4 | 5021, Day 5 |                  |
| PA   | 102_1936  | 5002, Day 2 | 5002, Day 3 |             |                  |
| PA   | 124_1891  | 012, Day 2  | 012, Day 3  |             |                  |
| PA   | 153_1941  | 5020, Day 1 | 5020, Day 4 |             |                  |
| PA   | 153_2015  | 013, Day 2  | 013, Day 3  |             |                  |
| PA   | 160_1903  | 5021, Day 4 | 5021, Day 5 |             |                  |
| PA   | 175_1892  | 5020, Day 2 | 5020, Day 4 |             |                  |
| PA   | 175_1935  | 5019, Day 1 | 5019, Day 2 | 5019, Day 3 |                  |
| PA   | 197_1916  | 5021, Day 4 | 5021, Day 5 |             |                  |
| PA   | 229_1944  | 5006, Day 1 | 5006, Day 2 |             |                  |
| PA   | 263_1968  | 5021, Day 4 | 5021, Day 5 |             |                  |
| PA   | 328_1719  | 5021, Day 4 | 5021, Day 5 |             |                  |
| PA   | 331_1824  | 5021, Day 4 | 5021, Day 5 |             |                  |
| PA   | 476_767   | 5001, Day 5 | 5004, Day 2 | 5006, Day 2 | 5019, Day 1      |
| NP   | 229_518   | 006, Day 1  | 5018, Day 1 | 5019, Day 1 |                  |
| NP   | 696_1378  | 5002, Day 2 | 5019, Day 2 | 5019, Day 3 | Challenge, Day 0 |
| NA   | 421_803   | 006, Day 3  | 013, Day 2  |             |                  |
| NA   | 633_737   | 010, Day 3  | 5019, Day 1 | 5021, Day 4 |                  |
| NS   | 291_518   | 001, Day 1  | 5004, Day 5 | 5019, Day 1 | 5021, Day 5      |

699

700 Table S6. Defective viral genome (DVG) species observed in multiple samples. DVGs are  
 701 organized by gene segment. DVG IDs represent the first\_last deleted reference based as  
 702 identified using the “jI” SAM tag.
